# Supplementary material for: Antioxidant and Anticancer Potential of Bioactive Compounds from Rhinacanthus nasutus Cell Suspension Culture
Source: MDPI journal article supplement (doi:10.3390/plants11151994), 2022-07-30
Supplement: s1 [file s1]

## Supplementary Figures

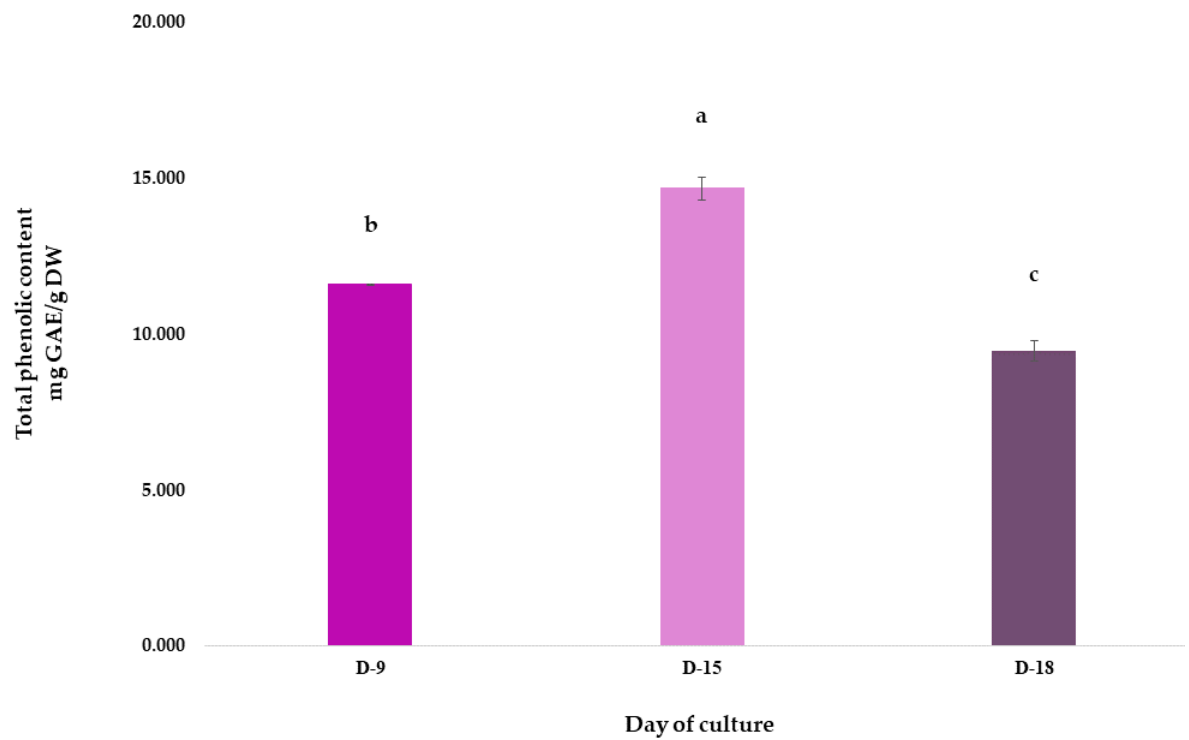

**Figure S1.** Total phenolic content of *R. nasutus* cell suspension cultures on day 9, 15 and 18. The data are the results performed in triplicate. Each value followed by the different superscripts are significantly different using post hoc test and ANOVA with Duncan's multiple range test (DMRT) at the level of 0.05 ( $p \leq 0.05$ ).

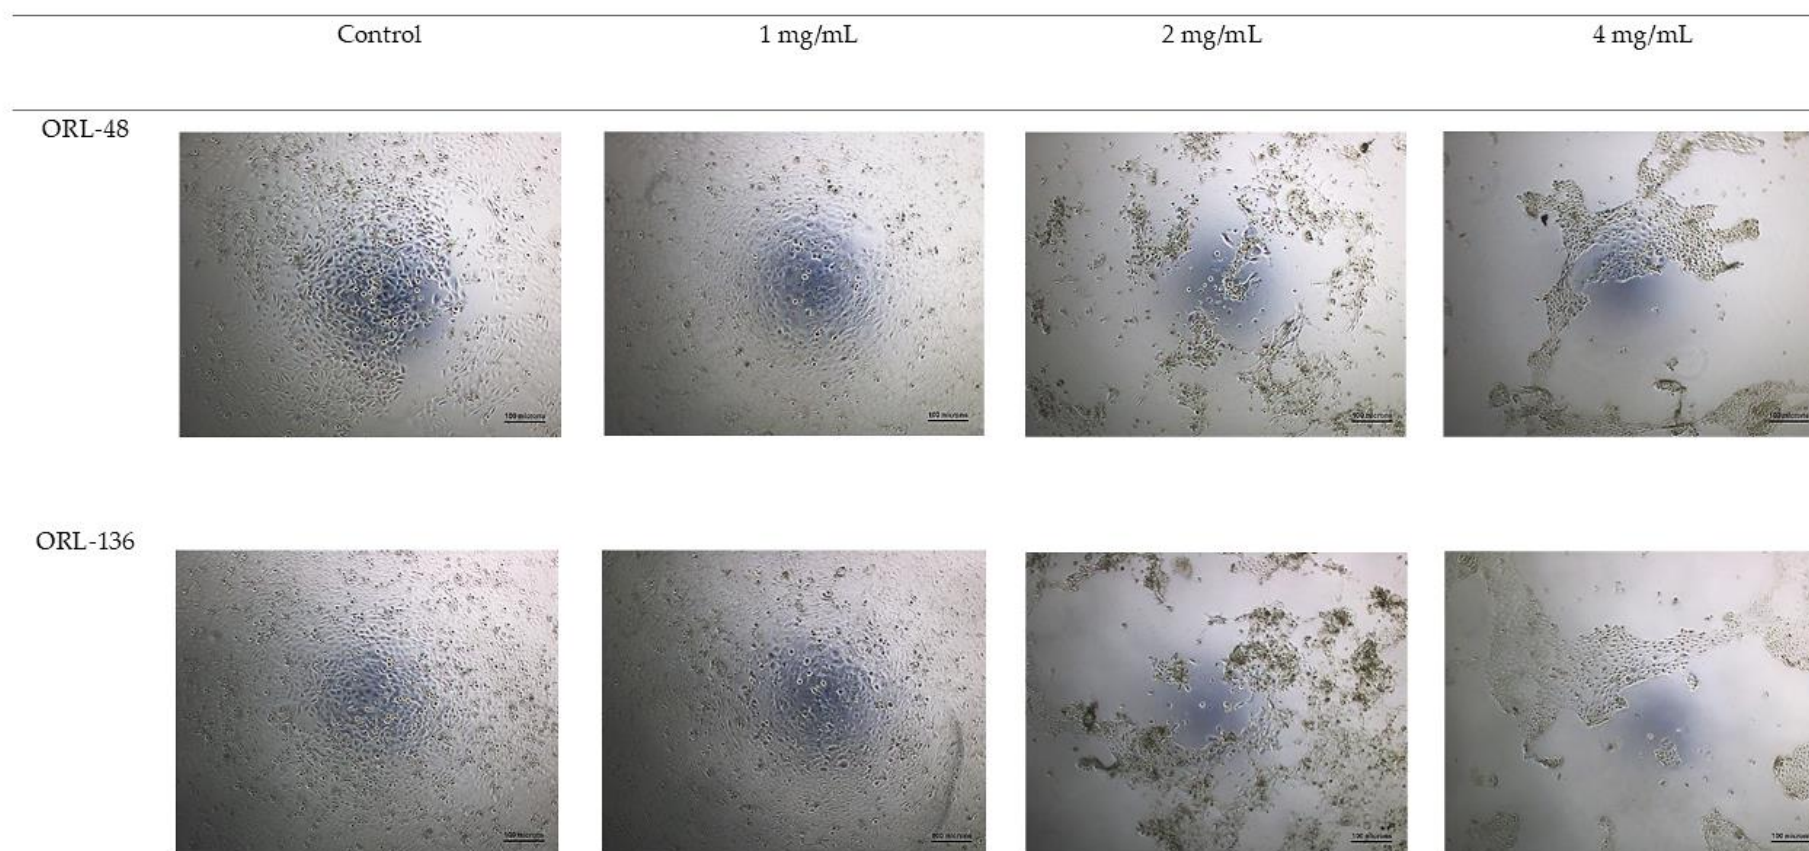

**Figure S2.** Morphology of ORL-48 and ORL-136 cell lines treated with the leaf extract. The scale bar represents 100  $\mu\text{m}$ .

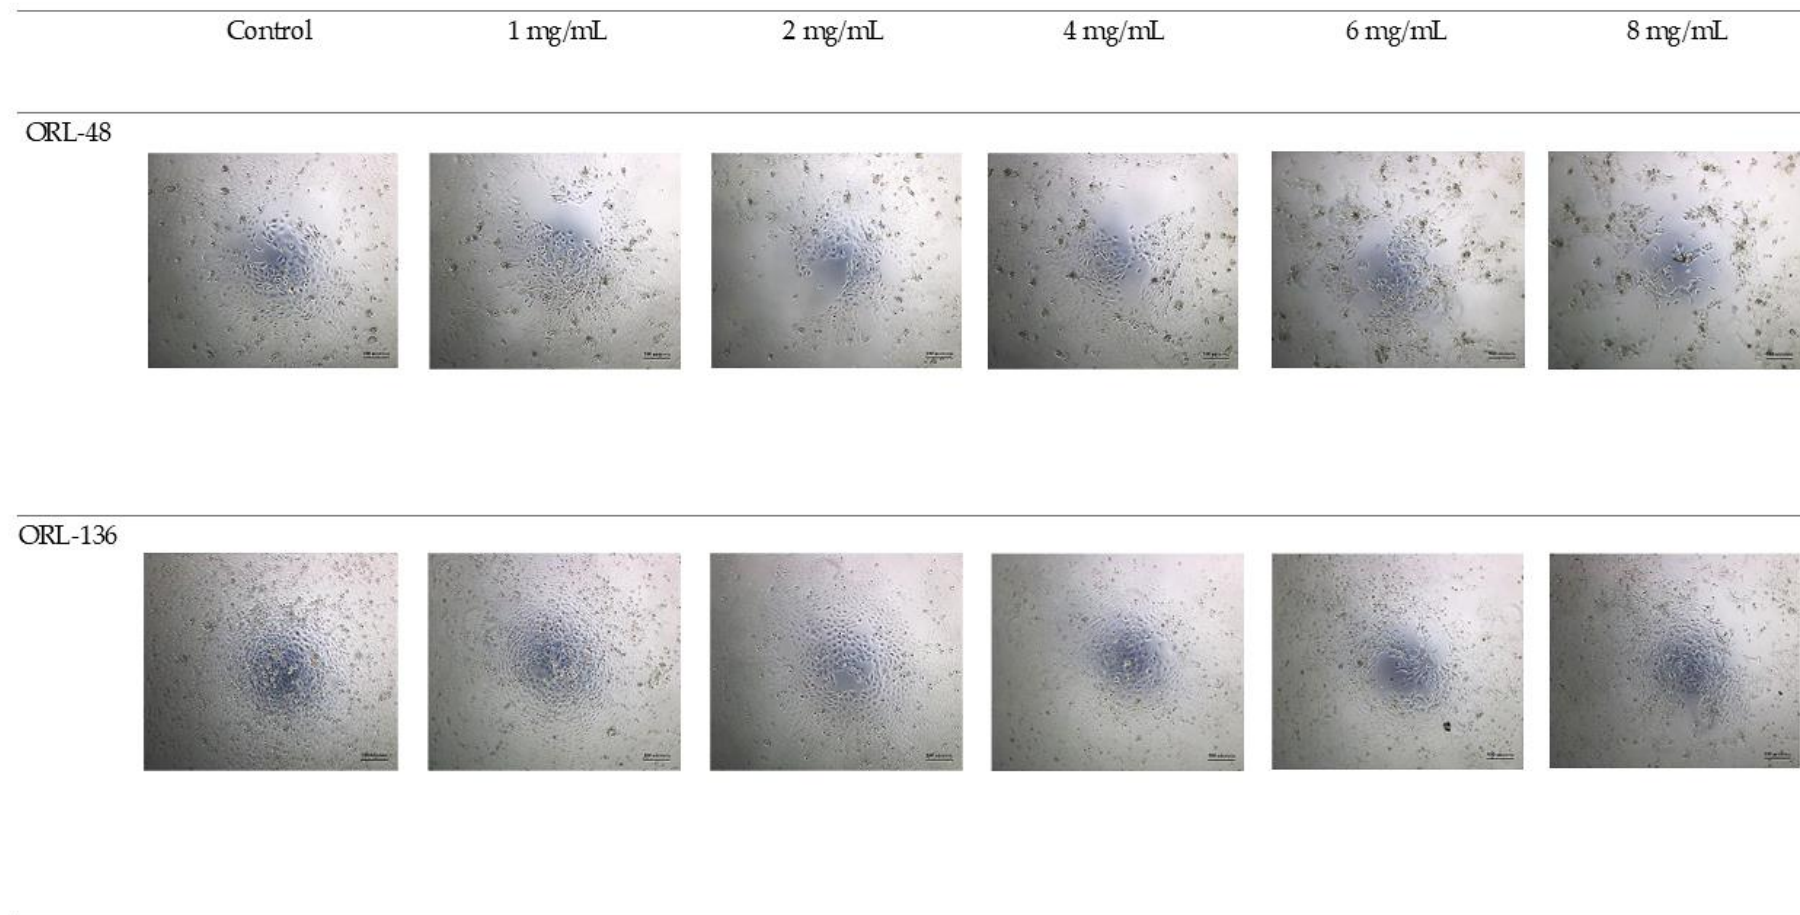

**Figure S3.** Morphology of ORL-48 and ORL-136 cell lines treated with the SCC extract. The scale bar represents 100  $\mu\text{m}$ .

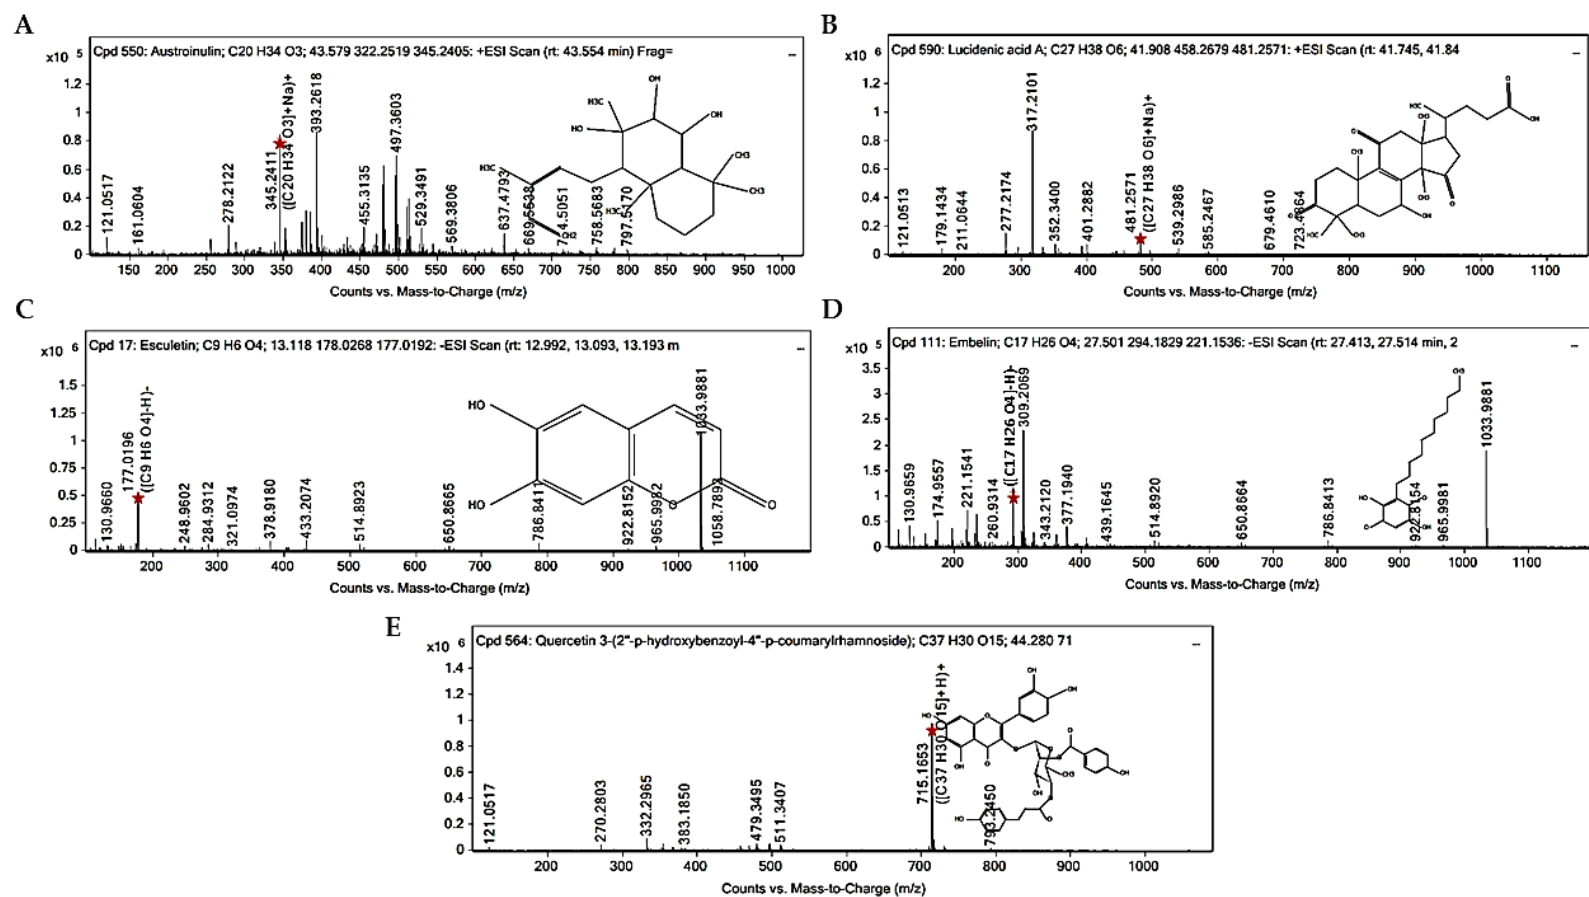

Figure S4. MS spectra of compounds detected in leaf and SCC extracts. (A) Austroinulin, (B) lucidenic acid, (C) esculetin, (D) embelin and (E) quercetin 3-(2''-p-hydroxybenzoyl-4''-p-coumaryl)rhamsoside. A star represents the detected compounds.

## Supplementary Tables

**Table S1.** List of compounds identified in *R. nasutus* leaf extract by UHPLC-QToF-MS analysis

Table S1A. Hexane partition [positive mode]

| Compound                                                      | Class | Subclass | Molecular Formula | Retention Time (min) | Mass     | Product Ions (m/z) |
|---------------------------------------------------------------|-------|----------|-------------------|----------------------|----------|--------------------|
| (R)-Bitalin A                                                 | 19    | 19.1     | C13 H14 O3        | 16.543               | 218.0936 | 219.1009           |
| His Glu Lys                                                   | 4     | -        | C17 H28 N6 O6     | 21.429               | 412.2061 | 413.2134           |
| Ser Arg Pro                                                   | 4     | -        | C14 H26 N6 O5     | 21.579               | 358.1974 | 359.2047           |
| Acetyl Tyrosine Ethyl Ester                                   | -     | -        | C13 H17 N O4      | 23.96                | 251.1166 | 252.1239           |
| (4E,8E,10E-d18:3)sphingosine                                  | -     | -        | C18 H33 N O2      | 24.16                | 295.2501 | 296.2574           |
| Palmitic amide                                                | 1     | 1.1      | C16 H33 N O       | 24.185               | 255.2572 | 256.2645           |
| C16 Sphinganine                                               | 5     | 5.1      | C16 H35 N O2      | 24.749               | 273.2677 | 274.275            |
| 3-Ethyltridecan-2-one                                         | -     | -        | C15 H30 O         | 24.937               | 226.2306 | 244.2644           |
| Hexadecan-3-one                                               | -     | -        | C16 H32 O         | 25.764               | 240.2464 | 258.2803           |
| U-46619 Glycine methyl ester                                  | -     | -        | C24 H39 N O5      | 26.04                | 421.2835 | 422.2907           |
| Sodium glycocholate                                           | 3     | 3.1      | C26 H43 N O6      | 26.24                | 465.3105 | 466.3179           |
| Granisetron                                                   | 19    | 19.2     | C18 H24 N4 O      | 26.465               | 312.1944 | 335.1837           |
| 2',4'-Dihydroxy-7-methoxy-8-prenylflavan                      | 17    | 17.1     | C21 H24 O4        | 26.691               | 340.167  | 363.1562           |
| N-acetyltryptophan                                            | 6     | 6.1      | C13 H14 N2 O3     | 26.741               | 246.1012 | 247.1085           |
| Gingerenone B                                                 | 19    | 19.3     | C22 H26 O6        | 26.892               | 386.174  | 409.1633           |
| Methyl nigakinone                                             | 19    | -        | C16 H12 N2 O3     | 27.242               | 280.0857 | 281.093            |
| Safficinolide                                                 | 19    | -        | C20 H24 O5        | 27.343               | 344.1623 | 345.1694           |
| Phytosphingosine                                              | 5     | 5.1      | C18 H39 N O3      | 27.468               | 317.294  | 318.3012           |
| beta-Zearalanol                                               | 16    | -        | C18 H26 O5        | 27.643               | 322.1792 | 345.1683           |
| Spisulosine                                                   | 5     | 5.1      | C18 H39 N O       | 27.668               | 285.3041 | 286.3114           |
| Maculosin                                                     | 6     | 6.1      | C14 H16 N2 O3     | 27.844               | 260.1173 | 261.1246           |
| Rosoxacin                                                     | 14    | 14.1     | C17 H14 N2 O3     | 28.044               | 294.1016 | 295.1089           |
| Lys Ser Asp                                                   | 4     | -        | C13 H24 N4 O7     | 28.695               | 348.1641 | 349.1713           |
| Auxin b                                                       | 2     | 2.1      | C18 H30 O4        | 28.946               | 310.2157 | 333.205            |
| PGF2α diethyl amide                                           | -     | -        | C24 H43 N O4      | 28.996               | 409.3203 | 410.3275           |
| 15-methyl-15(S)-PGE1                                          | -     | -        | C21 H36 O5        | 29.397               | 368.2569 | 391.2467           |
| Prosopinine                                                   | 19    | -        | C16 H33 N O3      | 29.497               | 287.2471 | 310.2364           |
| 4,6'-Epoxyrotoniniflavan-4-ol                                 | -     | -        | C26 H28 O6        | 29.598               | 436.1882 | 437.1957           |
| Chamuvaritin                                                  | -     | -        | C29 H24 O5        | 29.635               | 452.1615 | 453.1692           |
| (ent-16betaOH)-16,17-Dihydroxy-9(11)-kauren-19-oic acid       | 7     | -        | C20 H30 O4        | 30.049               | 334.2136 | 335.2208           |
| Imazamethabenz                                                | 6     | 6.1      | C15 H18 N2 O3     | 30.374               | 274.133  | 275.1403           |
| Alfuzosin                                                     | 18    | 18.1     | C19 H27 N5 O4     | 30.474               | 389.2073 | 407.2412           |
| Cincassiol B                                                  | 2     | 2.2      | C20 H32 O8        | 30.55                | 400.2108 | 423.2001           |
| (S)-Verimol F                                                 | 19    | 19.4     | C17 H20 O3        | 30.75                | 272.1422 | 295.1312           |
| N,N-dimethyl-Safingol                                         | -     | -        | C20 H43 N O2      | 30.875               | 329.3302 | 330.3375           |
| 3,3',4,4'-Tetrahydroxy-5,5'-diisopropyl-2,2'-dimethylbiphenyl | 19    | 19.5     | C20 H26 O4        | 31.151               | 330.1831 | 331.1901           |
| Dihydroxycarteolol M2                                         | -     | -        | C16 H24 N2 O5     | 31.201               | 324.1681 | 347.1573           |
| Leu Ala Arg                                                   | 4     | -        | C15 H30 N6 O4     | 31.301               | 358.2346 | 359.2419           |
| Methyl cis-p-coumarate 3-(3,7-dimethyl-2,6-octadienyl)        | 12    | 12.1     | C20 H26 O3        | 31.439               | 314.1874 | 315.1945           |
| Glabrone                                                      | 19    | 19.6     | C20 H16 O5        | 31.677               | 336.0989 | 337.1061           |
| Stearidonic Acid                                              | 1     | 1.2      | C18 H28 O2        | 31.878               | 276.2102 | 277.2175           |
| Ser Val Gln                                                   | 4     | -        | C13 H24 N4 O6     | 32.479               | 332.1683 | 333.1754           |
| ketophenylbutazone                                            | 16    | -        | C19 H18 N2 O3     | 32.629               | 322.1326 | 323.1397           |
| (±)-Rollipyrrole                                              | 16    | -        | C16 H20 N2 O3     | 32.767               | 288.1483 | 289.1557           |

| Compound                                                                                      | Class | Subclass | Molecular Formula | Retention Time (min) | Mass     | Product Ions (m/z) |
|-----------------------------------------------------------------------------------------------|-------|----------|-------------------|----------------------|----------|--------------------|
| Citronellyl alpha-toluate                                                                     | 1     | 1.3      | C18 H26 O2        | 33.018               | 274.1946 | 275.2019           |
| Pro Ser Gln                                                                                   | 4     | -        | C13 H22 N4 O6     | 33.782               | 330.1526 | 331.1598           |
| 12-Hydroxy-7-oxo-8,11,13-abietatrien-18-al                                                    | 2     | 2.2      | C20 H26 O3        | 33.782               | 314.188  | 315.1952           |
| Acetylenic acids; 17-Octadecen-9-ynoic acid                                                   | 1     | 1.4      | C18 H30 O2        | 34.007               | 278.225  | 279.2322           |
| Gln Val Ala                                                                                   | 4     | -        | C13 H24 N4 O5     | 34.358               | 316.1735 | 317.1806           |
| 11 $\beta$ -Prostaglandin F1 $\beta$                                                          | 1     | 1.5      | C20 H36 O5        | 34.458               | 356.2556 | 357.263            |
| Lisuride                                                                                      | 14    | 14.2     | C20 H26 N4 O      | 34.508               | 338.2101 | 361.2001           |
| 8-HpODE                                                                                       | 1     | 1.2      | C18 H32 O4        | 34.559               | 312.2293 | 313.2367           |
| Isocordoin                                                                                    | -     | -        | C20 H20 O3        | 34.621               | 308.14   | 309.1472           |
| Nb-Feruloyltryptamine                                                                         | 12    | 12.2     | C20 H20 N2 O3     | 34.784               | 336.1484 | 337.1556           |
| 9-Docosene                                                                                    | 19    | 19.7     | C22 H44           | 34.872               | 308.3458 | 326.3797           |
| trans,trans-Farnesyl phosphate                                                                | -     | -        | C15 H27 O4 P      | 35.16                | 302.1648 | 303.1722           |
| ent-8-deoxy-J2-IsoP                                                                           | -     | -        | C20 H28 O3        | 35.485               | 316.2024 | 317.2103           |
| $\alpha$ -Linolenoyl Ethanolamide                                                             | 5     | 5.1      | C20 H35 N O2      | 35.661               | 321.2678 | 344.257            |
| Tris(butoxyethyl)phosphate                                                                    | 19    | 19.8     | C18 H39 O7 P      | 35.862               | 398.2443 | 421.2337           |
| Scorzoside                                                                                    | 2     | 2.3      | C21 H30 O8        | 35.949               | 410.1946 | 433.1838           |
| 17-phenyl-trinor-PGE2                                                                         | 1     | 1.5      | C23 H30 O5        | 36.162               | 386.2107 | 409.1999           |
| 1,2,3,4-Tetrahydro-1-[1-hydroxy-3-(4-hydroxyphenyl)-2-propenyl]-7-methoxy-2,6-naphthalenediol | 19    | -        | C20 H22 O5        | 36.287               | 342.1473 | 365.1366           |
| 11-deoxy-PGE1                                                                                 | 1     | 1.5      | C20 H34 O4        | 36.751               | 338.2472 | 361.2361           |
| Gancaonin V                                                                                   | 15    | 15.1     | C19 H20 O4        | 36.913               | 312.1371 | 335.1262           |
| Epanolol                                                                                      | 11    | -        | C20 H23 N3 O4     | 37.214               | 369.1692 | 392.1584           |
| Ergine                                                                                        | -     | -        | C16 H17 N3 O      | 37.315               | 267.1367 | 285.1711           |
| Cyclopassifloside II                                                                          | 2     | 2.4      | C37 H62 O11       | 37.515               | 682.4265 | 683.434            |
| Verimol C                                                                                     | 11    | 11.1     | C18 H20 O4        | 37.741               | 300.1357 | 301.1429           |
| Crucigasterin 277                                                                             | -     | -        | C18 H31 N O       | 37.816               | 277.2415 | 278.2491           |
| 9-hydroxy-13-oxo-10-octadecenoic acid                                                         | 1     | 1.2      | C18 H32 O4        | 37.841               | 312.2313 | 335.2205           |
| PA(22:6(4Z,7Z,10Z,13Z,16Z,19Z)/17:1(9Z))                                                      | 19    | 19.9     | C42 H69 O8 P      | 38.292               | 732.474  | 367.2455           |
| Androst-4-ene-3alpha,17beta-diol diacetate                                                    | -     | -        | C23 H34 O4        | 38.304               | 374.2446 | 375.2519           |
| (25S)-5alpha-cholestan-3beta,4beta,6alpha,8beta,15alpha,16beta,26-heptol                      | -     | -        | C27 H48 O7        | 38.442               | 484.34   | 507.3297           |
| Leu Trp Lys                                                                                   | 4     | -        | C23 H35 N5 O4     | 38.517               | 445.2695 | 463.3033           |
| Simvastatin acid                                                                              | 19    | 19.10    | C25 H38 O5        | 38.693               | 418.2704 | 419.2778           |
| Montanol                                                                                      | 1     | 1.4      | C21 H36 O4        | 38.818               | 352.2624 | 375.2516           |
| Deoxycorticosterone                                                                           | 3     | 3.2      | C21 H30 O3        | 38.893               | 330.218  | 331.2253           |
| Piperchromenoic acid                                                                          | 2     | 2.1      | C22 H28 O3        | 39.332               | 340.2048 | 363.1942           |
| Polidocanol                                                                                   | 8     | 8.1      | C30 H62 O10       | 39.444               | 582.4348 | 605.4241           |
| Digitoxigenin                                                                                 | 3     | 3.3      | C23 H34 O4        | 39.444               | 374.2445 | 375.2518           |
| Ser Ser Arg                                                                                   | 4     | -        | C12 H24 N6 O6     | 39.632               | 348.1751 | 371.1645           |
| 17,20-dimethyl Prostaglandin F1 $\alpha$                                                      | 1     | 1.5      | C22 H40 O5        | 39.707               | 384.2857 | 385.293            |
| 13-methoxy-heneicosanoic acid                                                                 | -     | -        | C22 H44 O3        | 39.795               | 356.3294 | 379.3187           |
| N-cis-octadec-9Z-enoyl-L-Homoserine lactone                                                   | -     | -        | C22 H39 N O3      | 39.92                | 365.2924 | 366.2996           |
| Piperoic acid                                                                                 | 2     | 2.5      | C22 H30 O4        | 40.02                | 358.2138 | 359.2211           |
| 14,15-HxA3 (11S)                                                                              | -     | -        | C20 H32 O4        | 40.196               | 336.2297 | 337.237            |

| Compound                                                                                              | Class | Subclass | Molecular Formula | Retention Time (min) | Mass     | Product Ions (m/z) |
|-------------------------------------------------------------------------------------------------------|-------|----------|-------------------|----------------------|----------|--------------------|
| 16-Hydroxy-10-oxohexadecanoic acid                                                                    | 1     | 1.4      | C16 H30 O4        | 40.321               | 286.215  | 309.2043           |
| Medroxyprogesterone                                                                                   | 19    | 19.11    | C22 H32 O3        | 40.397               | 344.234  | 345.2411           |
| Thromboxanoic acid skeleton                                                                           | -     | -        | C20 H36 O4        | 40.635               | 340.2615 | 341.2689           |
| 8beta-Angeloyloxy-15-hydroxy-1alpha,10R-dimethoxy-3-oxo-11(13)-germacren-12,6alpha-olide              | 2     | 2.3      | C22 H32 O8        | 40.747               | 424.2094 | 425.2166           |
| 12(13)-EpOME                                                                                          | 1     | 1.4      | C18 H32 O3        | 40.747               | 296.2347 | 297.2421           |
| Austalide I                                                                                           | 9     | 9.1      | C27 H34 O8        | 40.873               | 486.2252 | 487.2329           |
| 20,24-Epoxy-25,26-dihydroxydammaran-3-one                                                             | 2     | 2.4      | C30 H50 O4        | 40.998               | 474.3716 | 497.3607           |
| Capnine                                                                                               | 6     | 6.1      | C17 H37 N O4 S    | 41.123               | 351.2444 | 369.2781           |
| Quasiprotopanaxatriol                                                                                 | 2     | 2.6      | C30 H50 O3        | 41.223               | 458.3759 | 481.3654           |
| PI(13:0/0:0)                                                                                          | -     | -        | C22 H43 O12 P     | 41.323               | 530.2506 | 531.2581           |
| Asclepin                                                                                              | 1     | 1.4      | C31 H42 O10       | 41.511               | 574.2775 | 575.2849           |
| Cortexolone                                                                                           | 3     | 3.2      | C21 H30 O4        | 41.9                 | 346.2142 | 347.2216           |
| Acetyl-11-keto-B-Boswellic Acid, 3-                                                                   | 2     | 2.6      | C32 H48 O5        | 41.912               | 512.3482 | 513.3556           |
| Schleicherastatin 5                                                                                   | 3     | 3.4      | C29 H48 O3        | 42.201               | 444.361  | 445.3683           |
| 2E-Phytanoic acid                                                                                     | -     | -        | C20 H38 O2        | 42.426               | 310.2887 | 311.2959           |
| 1-Oleoyle-2-acetyl-sn-glycerol                                                                        | -     | -        | C23 H42 O5        | 42.476               | 398.3024 | 399.3098           |
| AT-56                                                                                                 | -     | -        | C25 H27 N5        | 42.627               | 397.2273 | 420.2166           |
| Methyl acetyl ricinoleate                                                                             | -     | -        | C21 H38 O4        | 42.726               | 354.2759 | 355.2832           |
| N-Desalkylbuprenorphine                                                                               | 15    | -        | C25 H35 N O4      | 42.777               | 413.2552 | 414.2626           |
| PI(15:0/16:0)                                                                                         | -     | -        | C40 H77 O13 P     | 42.852               | 796.5098 | 797.5173           |
| (ent-2b,4S,9a)-2,4,9-Trihydroxy-10(14)-oplopen-3-one 2-(2-methylbutanoate) 9-(3-methyl-2E-pentenoate) | 2     | 2.5      | C26 H40 O6        | 43.228               | 448.2822 | 449.2895           |
| Corosolic acid                                                                                        | 2     | 2.6      | C30 H48 O4        | 43.303               | 472.3561 | 495.3453           |
| 3-Epimasticadienolic acid                                                                             | 2     | 2.6      | C30 H48 O3        | 43.378               | 456.3606 | 479.3498           |
| Austroinulin                                                                                          | 2     | 2.2      | C20 H34 O3        | 43.579               | 322.2519 | 345.2411           |
| Auricularine                                                                                          | -     | -        | C33 H42 N4        | 43.591               | 494.3429 | 495.3462           |
| 1-Naphthylacetylspermine                                                                              | -     | -        | C22 H34 N4 O      | 43.604               | 370.2726 | 393.2618           |
| Ganodermic acid TQ                                                                                    | 16    | -        | C32 H46 O5        | 43.704               | 510.3365 | 511.3406           |
| 3α,6β,12α-Trihydroxy-5β-cholan-24-oic Acid                                                            | -     | -        | C24 H40 O5        | 43.829               | 408.2856 | 409.293            |
| Harderoporphyryn                                                                                      | 10    | 10.1     | C35 H36 N4 O6     | 44.08                | 608.2648 | 609.2722           |
| 9alpha-(3-Methyl-2E-pentenoyloxy)-4S-hydroxy-10(14)-oplopen-3-one                                     | 2     | 2.5      | C21 H32 O4        | 44.18                | 348.2299 | 349.2372           |
| Quercetin 3-(2''-p-hydroxybenzoyl-4''-p-coumarylrhamnoside)                                           | 17    | 17.5     | C37 H30 O15       | 44.28                | 714.1578 | 715.1653           |
| N,N-dimethyl arachidonoyl amine                                                                       | -     | -        | C22 H37 N O       | 44.343               | 331.2891 | 332.2964           |
| Atocalcitol                                                                                           | -     | -        | C32 H46 O4        | 44.443               | 494.3412 | 495.3452           |
| 11beta-Hydroxy-5beta-cholan-24-oic Acid                                                               | -     | -        | C24 H40 O3        | 44.631               | 376.2975 | 377.3049           |
| Resolvin D2                                                                                           | 1     | 1.4      | C22 H32 O5        | 44.982               | 376.2237 | 399.2137           |
| Paratocarpin E                                                                                        | -     | -        | C25 H28 O5        | 45.032               | 408.1949 | 431.1848           |
| 7-Ketodeoxycholic acid                                                                                | 3     | 3.1      | C24 H38 O5        | 45.132               | 406.2713 | 407.2786           |
| (13R,14R)-7-Labdene-13,14,15-triol                                                                    | 2     | 2.2      | C20 H36 O3        | 45.508               | 324.2657 | 325.2731           |

| Compound                                                                       | Class | Subclass | Molecular Formula | Retention Time (min) | Mass     | Product Ions (m/z) |
|--------------------------------------------------------------------------------|-------|----------|-------------------|----------------------|----------|--------------------|
| (24E)-3alpha-Acetoxy-15alpha,22S-dihydroxylanosta-7,9(11),24-trien-26-oic acid | 2     | 2.6      | C32 H48 O6        | 45.658               | 528.3442 | 529.3515           |
| Pheophorbide a                                                                 | -     | -        | C35 H36 N4 O5     | 45.696               | 592.2707 | 593.278            |
| Santalyl phenylacetate                                                         | 2     | 2.5      | C23 H30 O2        | 45.784               | 338.2255 | 356.2593           |
| Polyporusterone C                                                              | 3     | 3.5      | C28 H44 O6        | 46.034               | 476.315  | 477.3219           |
| 3alpha,7alpha,12alpha-Trihydroxy-5beta-23E-cholestan-26-oic acid               | 1     | 1.6      | C26 H42 O5        | 46.134               | 434.303  | 435.3106           |
| 3β-Acetoxydeoxyangolensic Acid, Methyl Ester                                   | -     | -        | C29 H38 O8        | 46.147               | 514.2572 | 515.2649           |
| PI(15:0/0:0)                                                                   | -     | -        | C24 H47 O12 P     | 46.209               | 558.2823 | 559.29             |
| Tigecycline                                                                    | 13    | -        | C29 H39 N5 O8     | 46.41                | 585.2819 | 603.316            |
| Palmitoyl N-Isopropylamide                                                     | -     | -        | C19 H39 N O       | 46.71                | 297.3038 | 298.3111           |
| DG(22:5(7Z,10Z,13Z,16Z,19Z)/14:0/0:0)                                          | 19    | 19.12    | C39 H66 O5        | 46.936               | 614.4893 | 637.479            |
| Lepidiumterpenyl ester                                                         | 2     | 2.5      | C23 H42 O4        | 47.036               | 382.3078 | 383.315            |
| 2-Deoxybrassinolide                                                            | 3     | 3.3      | C28 H48 O5        | 47.087               | 464.3491 | 465.3564           |
| PGF2α Alcohol                                                                  | -     | -        | C20 H36 O4        | 47.236               | 340.2624 | 363.2516           |
| Polyporusterone F                                                              | 3     | 3.1      | C28 H46 O5        | 47.337               | 462.335  | 463.3423           |
| Persenone B                                                                    | 1     | 1.7      | C23 H42 O4        | 47.437               | 382.3079 | 383.3156           |
| N-Hexadecanoylpyrrolidine                                                      | 19    | 19.13    | C20 H39 N O       | 47.512               | 309.3039 | 310.3112           |
| 4,4'-Diapophytofluene                                                          | -     | -        | C30 H46           | 47.612               | 406.3605 | 407.3676           |
| Coenzyme Q4                                                                    | 2     | 2.7      | C29 H42 O4        | 47.637               | 454.3074 | 455.3146           |
| 27-Nor-5b-cholestane-3a,7a,12a,24,25-pentol                                    | 3     | 3.1      | C26 H46 O5        | 47.713               | 438.3355 | 461.3242           |
| Vitamin D3 glucosiduronate                                                     | 3     | 3.6      | C33 H52 O7        | 48.013               | 560.3698 | 561.3772           |
| 3alpha,7alpha,12alpha,24-tetrahydroxy-24-methyl-5beta-cholestan-26-oic acid    | 1     | 1.6      | C28 H48 O6        | 48.064               | 480.346  | 481.3534           |
| 2-(9R-(tricosanoyloxy)-3-methyl-2Z-decenoyloxy)-ethanesulfonic acid            | -     | -        | C36 H68 O7 S      | 48.164               | 644.4674 | 667.4566           |
| Haplophytine                                                                   | -     | -        | C37 H40 N4 O7     | 48.239               | 652.2913 | 653.2986           |
| Hexacosanedioic acid                                                           | -     | -        | C26 H50 O4        | 48.314               | 426.3707 | 449.36             |
| Harderoporphyrinogen                                                           | 10    | 10.1     | C35 H42 N4 O6     | 48.515               | 614.3132 | 637.3026           |
| Momordol                                                                       | 1     | 1.7      | C26 H48 O5        | 48.74                | 440.3483 | 441.3556           |
| Theasapogenol A                                                                | 2     | 2.6      | C30 H50 O6        | 48.84                | 506.3589 | 507.3662           |
| 28-Homobrassinolide                                                            | 3     | 3.3      | C29 H50 O6        | 48.865               | 494.3617 | 517.3511           |
| 6-Deoxodolichosterone                                                          | 3     | 3.1      | C28 H48 O4        | 48.991               | 448.3548 | 449.362            |
| 12β-Hydroxy-3-oxo-5β-cholan-24-oic Acid                                        | 3     | 3.1      | C24 H38 O4        | 49.066               | 390.2782 | 413.2675           |



**Table S1B.** Hexane partition [negative mode]

| Compound                                                   | Class | Subclass | Molecular Formula | Retention Time(min) | Mass     | Product Ions (m/z) |
|------------------------------------------------------------|-------|----------|-------------------|---------------------|----------|--------------------|
| 3-Hydroxycoumarin                                          | 24    | 24.1     | C9 H6 O3          | 15.937              | 162.0316 | 161.0243           |
| Kamahine C                                                 | 8     | 8.1      | C14 H20 O5        | 21.975              | 268.1312 | 267.124            |
| 2,2,4,4-Tetramethyl-6-(1-oxobutyl)-1,3,5-cyclohexanetrione | 2     | 2.1      | C14 H20 O4        | 24.155              | 252.1362 | 251.129            |
| Methylhalfordinol                                          | 19    | 19.15    | C15 H12 N2 O2     | 26.122              | 252.0903 | 311.1039           |
| Embelin                                                    | 2     | 2.7      | C17 H26 O4        | 27.413              | 294.1835 | 293.1763           |
| SU 5416                                                    | -     | -        | C15 H14 N2 O      | 28.039              | 238.1108 | 297.1247           |
| 9-hydroperoxy-10E,12,15Z-octadecatrienoic acid             | 1     | 1.2      | C18 H30 O4        | 28.265              | 310.2144 | 309.207            |
| (±)9-HpODE                                                 | 1     | 1.2      | C18 H32 O4        | 30.194              | 312.2301 | 311.2228           |
| 5-O-Methylembelin                                          | 2     | 2.7      | C18 H28 O4        | 31.296              | 308.1988 | 307.1913           |
| 13(S)-HOTrE                                                | 1     | 1.2      | C18 H30 O3        | 31.948              | 294.2199 | 293.2127           |
| 9(S)-HOTrE                                                 | 1     | 1.2      | C18 H30 O3        | 32.249              | 294.2202 | 293.2131           |
| 2',4',6',3,4-Pentahydroxy- 3',5-diprenyldihydrochalcone    | 19    | 19.16    | C25 H30 O6        | 32.499              | 426.204  | 425.1966           |
| alpha-licanic acid                                         | -     | -        | C18 H28 O3        | 33.05               | 292.2044 | 291.1972           |
| Pentosidine                                                | 6     | 6.1      | C17 H26 N6 O4     | 33.075              | 378.2016 | 377.1943           |
| Lonchocarpol B                                             | -     | -        | C25 H30 O7        | 33.701              | 442.1989 | 441.1916           |
| 9-OxoOTrE                                                  | -     | -        | C18 H28 O3        | 33.827              | 292.204  | 291.1967           |
| Abyssinin III                                              | -     | -        | C25 H28 O6        | 34.704              | 424.1884 | 423.1812           |
| 9-OxoODE                                                   | 1     | 1.2      | C18 H30 O3        | 36.032              | 294.2197 | 293.2124           |
| cis-9,10-Epoxystearic acid                                 | 1     | 1.2      | C18 H34 O3        | 36.708              | 298.2509 | 297.2437           |
| Punctaporin B                                              | 2     | -        | C15 H24 O3        | 41.318              | 252.1725 | 251.1653           |
| 5-Androstene-3b,16b,17a-triol                              | 3     | 3.7      | C19 H30 O3        | 41.419              | 306.2198 | 305.2127           |
| Heliocide H2                                               | 19    | 19.17    | C25 H30 O5        | 41.532              | 410.2098 | 409.2026           |
| Pinolenic Acid                                             | 1     | 1.2      | C18 H30 O2        | 41.695              | 278.2246 | 277.2174           |
| Tetrahydrocorticosterone                                   | 3     | 3.2      | C21 H34 O4        | 42.722              | 350.2458 | 349.2385           |
| 9(Z),11(E)-Conjugated Linoleic Acid                        | 1     | 1.2      | C18 H32 O2        | 43.774              | 280.2404 | 279.2331           |
| Scarlet Red                                                | 19    | -        | C24 H20 N4 O      | 43.787              | 380.1651 | 379.158            |
| methyl 9,10-epoxy-12,15-octadecadienoate                   | 19    | -        | C19 H32 O3        | 43.824              | 308.2351 | 307.2278           |
| 3R-hydroxy-eicosanoic acid                                 | 1     | 1.4      | C20 H40 O3        | 45.779              | 328.2985 | 327.2913           |
| 2-hydroxy behenic                                          | 1     | 1.4      | C22 H44 O3        | 45.866              | 356.3298 | 355.3227           |
| Ro 31-7549                                                 | -     | -        | C24 H22 N4 O2     | 46.317              | 398.1756 | 397.1688           |
| S-Japonin                                                  | 2     | 2.5      | C19 H28 O3 S      | 46.33               | 336.1755 | 381.1738           |
| α-Linolenic Acid                                           | 1     | 1.2      | C18 H30 O2        | 47.019              | 278.225  | 277.2177           |
| 6-Deoxytyphasterol                                         | -     | -        | C28 H50 O3        | 47.094              | 434.3757 | 479.374            |
| 5-b-Cholestane-3a,7a,12a-triol                             | 3     | 3.5      | C27 H48 O3        | 47.157              | 420.3599 | 419.3527           |
| Androsterone sulfate                                       | 3     | 3.8      | C19 H30 O5 S      | 47.507              | 370.181  | 369.1737           |
| 5β-Cholestane-3α,7α,12α-triol                              | 3     | 3.5      | C27 H48 O3        | 47.532              | 420.3596 | 419.3525           |
| PS(22:6(4Z,7Z,10Z,13Z,16Z,19Z)/17:2(9Z,12Z))               | -     | -        | C45 H72 N O10 P   | 48.309              | 817.4859 | 816.4789           |
| Phytomonic Acid                                            | -     | -        | C19 H36 O2        | 48.585              | 296.2714 | 295.2641           |
| PA(20:5(5Z,8Z,11Z,14Z,17Z)/12:0)                           | -     | -        | C35 H59 O8 P      | 49.161              | 638.3923 | 637.3853           |
| Piperonyl sulfoxide                                        | 19    | -        | C18 H28 O3 S      | 49.237              | 324.1756 | 383.1895           |
| 3'-N-Acetyl-4'-O-(10,12-octadecadienoyl)fusarochromane     | 1     | 1.2      | C35 H52 N2 O6     | 49.537              | 596.3813 | 655.3956           |

**Table S1C.** EtOAc partition [positive mode]

| Compound                                                                           | Class | Subclass | Molecular Formula | Retention Time (min) | Mass     | Product Ions (m/z) |
|------------------------------------------------------------------------------------|-------|----------|-------------------|----------------------|----------|--------------------|
| Choline                                                                            | 5     | 5.2      | C5H14NO           | 1.982                | 104.1078 | 104.1072           |
| Isoamyl nitrite                                                                    | 19    | 19.24    | C5 H11 N O2       | 2.057                | 117.0791 | 140.0683           |
| Betaine                                                                            | 6     | 6.1      | C5H12NO2          | 2.057                | 118.087  | 118.0864           |
| Adenine                                                                            | 26    | 26.1     | C5 H5 N5          | 3.034                | 135.0546 | 136.0619           |
| Niacinamide                                                                        | 19    | 19.25    | C6 H6 N2 O        | 3.986                | 122.0481 | 123.0554           |
| 3-Pyrimidin-2-yl-2-pyrimidin-2-ylmethyl-Propionic Acid                             | 6     | 6.2      | C12 H12 N4 O2     | 4.487                | 244.0969 | 262.1307           |
| Niazirin                                                                           | 8     | 8.3      | C14 H17 N O5      | 4.512                | 279.1113 | 297.1451           |
| Butamben                                                                           | 20    | 20.1     | C11 H15 N O2      | 4.537                | 193.1105 | 194.1178           |
| D-Alanyl-(R)-lactate                                                               | -     | -        | C6 H11 N O4       | 4.637                | 161.0693 | 184.0585           |
| 1,2,3,4-Tetrahydro-b-carboline-1,3-dicarboxylic acid                               | 19    | -        | C13 H12 N2 O4     | 5.201                | 260.08   | 261.0872           |
| Anhalonidine                                                                       | -     | -        | C12 H17 N O3      | 20.523               | 223.1213 | 224.1286           |
| 2,5-Dihydro-2,4-dimethyloxazole                                                    | 19    | 19.26    | C5 H9 N O         | 20.949               | 99.0686  | 100.0759           |
| 6Z-Octene-2,4-diynoic acid                                                         | -     | -        | C8 H6 O2          | 21.099               | 134.0368 | 135.044            |
| Asparenyol                                                                         | 11    | 11.1     | C18 H16 O3        | 21.325               | 280.1088 | 303.098            |
| Ser-Ile-OH                                                                         | 4     | -        | C15 H20 N2 O7     | 22.427               | 340.1276 | 341.1349           |
| Methyl 1-methoxy-1H-indole-3-carboxylate                                           | 23    | 23.1     | C11 H11 N O3      | 22.978               | 205.0742 | 206.0815           |
| Oxyquinoline                                                                       | 14    | -        | C9 H7 N O         | 23.83                | 145.0532 | 146.0605           |
| Dinoseb acetate                                                                    | 22    | -        | C12 H14 N2 O6     | 24.031               | 282.0861 | 305.0754           |
| N-Hydroxy-L-tryptophan                                                             | 23    | 23.1     | C11 H12 N2 O3     | 24.181               | 220.0852 | 221.0925           |
| Methyl 2,3-dihydro-3,5-dihydroxy-2-oxo-3-indoleacetic acid                         | 23    | 23.1     | C11 H11 N O5      | 24.281               | 237.0643 | 238.0715           |
| N5-(3,4-Dioxo-1,5-cyclohexadien-1-yl)-L-glutamine                                  | 6     | 6.1      | C11 H12 N2 O5     | 24.419               | 252.0752 | 253.0824           |
| Dihydropteroic acid                                                                | 25    | 25.1     | C14 H14 N6 O3     | 24.882               | 314.112  | 337.101            |
| trans-4,5-Dihydroxy-4,5-dihydropyrene                                              | -     | -        | C16 H12 O2        | 24.982               | 236.0835 | 259.0726           |
| 2,3-dihydro-2-oxo-1H-Benzimidazole-1-propanoic acid                                | -     | -        | C10 H10 N2 O3     | 24.995               | 206.0698 | 207.0772           |
| Parathion                                                                          | 19    | 19.27    | C10 H14 N O5 P S  | 25.083               | 291.0327 | 309.0661           |
| Idebenone Metabolite (Benzenebutanoic acid, 2,5-dihydroxy-3,4-dimethoxy-6-methyl-) | -     | -        | C13 H18 O6        | 25.096               | 270.1114 | 293.1007           |
| HoPhe-His-OH                                                                       | -     | -        | C21 H20 N4 O6     | 25.183               | 424.1394 | 425.1467           |
| 3-O-Methylniveusin A                                                               | 2     | 2.3      | C21 H28 O8        | 25.183               | 408.1777 | 409.1849           |
| 2-(diethylamino)-4'-hydroxy-Propiophenone                                          | -     | -        | C13 H19 N O2      | 25.334               | 221.1421 | 222.1494           |
| methyl 9-hydroperoxy-10,12,13,15-bisepidioxo-16E-octadecenoate                     | -     | -        | C19 H32 O8        | 25.396               | 388.2105 | 411.1999           |
| Sonchuionoside C                                                                   | 2     | 2.4      | C19 H30 O8        | 25.471               | 386.1948 | 409.184            |
| Pro Trp Gly                                                                        | 4     | -        | C18 H22 N4 O4     | 25.496               | 358.1638 | 381.1531           |
| Alpha-Pyrrolidinopropiophenone                                                     | -     | -        | C13 H17 N O       | 25.534               | 203.1314 | 204.1387           |
| Methyl 1-(methylsulfinyl)propyl disulfide                                          | 19    | -        | C5 H12 O S3       | 25.659               | 184.0056 | 185.0128           |
| 1,4-Benzodioxin-2(3H)-one                                                          | 19    | 19.28    | C8 H6 O3          | 25.822               | 150.0321 | 151.0392           |
| trans-p-Coumaric acid 4-glucoside                                                  | -     | -        | C15 H18 O8        | 25.96                | 326.1011 | 349.0903           |
| 4,5-seco-Dopa                                                                      | 6     | 6.1      | C9 H11 N O6       | 25.985               | 229.0593 | 252.0484           |
| Glucosyl (2E,6E,10x)-10,11-dihydroxy-2,6-farnesadienoate                           | 2     | 2.4      | C21 H36 O9        | 26.085               | 432.2363 | 455.2256           |
| Trp-P-1                                                                            | 4     | -        | C13 H13 N3        | 26.198               | 211.1117 | 212.119            |
| Anatoxin a(s)                                                                      | 19    | -        | C7 H17 N4 O4 P    | 26.336               | 252.098  | 270.1317           |
| trans-Grandmarin                                                                   | 24    | 24.2     | C15 H16 O6        | 26.398               | 292.0953 | 315.0845           |
| Compound                                                                           | Class | Subclass | Molecular Formula | Retention Time (min) | Mass     | Product Ions (m/z) |
| Pisumionoside                                                                      | 2     | 2.4      | C19 H32 O9        | 26.624               | 404.2052 | 427.1944           |
| 2-Phenylethyl beta-D-glucopyranoside                                               | 8     | 8.3      | C14 H20 O6        | 26.661               | 284.1264 | 307.1161           |

|                                                                                                      |              |                 |                          |                             |             |                           |
|------------------------------------------------------------------------------------------------------|--------------|-----------------|--------------------------|-----------------------------|-------------|---------------------------|
| (R)-1-O-b-D-glucopyranosyl-1,3-octanediol                                                            | 1            | 1.8             | C14 H28 O7               | 26.762                      | 308.1843    | 331.1735                  |
| 3-Methylbutyl 2-furanbutanoate                                                                       | 1            | 1.9             | C13 H20 O3               | 26.837                      | 224.1416    | 247.1309                  |
| Niazirinin                                                                                           | 8            | 8.3             | C16 H19 N O6             | 26.962                      | 321.1219    | 344.1114                  |
| Mecarbinzid                                                                                          | -            | -               | C13 H16 N4 O3 S          | 26.962                      | 308.0949    | 309.1017                  |
| 2,5-Diamino-6-hydroxy-4-(5'-phosphoribosylamino)-pyrimidine                                          | -            | -               | C9 H16 N5 O8 P           | 27.012                      | 353.0734    | 354.0805                  |
| 5-Hydroxythalidomide                                                                                 | 19           | 19.29           | C13 H10 N2 O5            | 27.138                      | 274.0599    | 292.0938                  |
| Hexahydro-6,7-dihydroxy-5-(hydroxymethyl)-3-(2-hydroxyphenyl)-2H-pyrano[2,3-d]oxazol-2-one           | 21           | 21.4            | C13 H15 N O7             | 27.263                      | 297.0847    | 298.0919                  |
| Disuccinimidyl Suberate                                                                              | 6            | 6.3             | C16 H20 N2 O8            | 27.288                      | 368.1229    | 391.1122                  |
| Verimol C                                                                                            | 11           | 11.1            | C18 H20 O4               | 27.325                      | 300.1356    | 323.1248                  |
| trans-3-Hydroxycotinine glucuronide                                                                  | 8            | 8.4             | C16 H20 N2 O8            | 27.388                      | 368.1228    | 369.1299                  |
| 8-Acetylegelolide                                                                                    | 19           | -               | C16 H20 O6               | 27.438                      | 308.1269    | 331.1161                  |
| Dopaquinone                                                                                          | 6            | 6.1             | C9 H9 N O4               | 27.463                      | 195.0539    | 196.0612                  |
| 3,5-Pyridinedicarboxylic acid, 2-(hydroxymethyl)-6-methyl-4-(3-nitrophenyl)-, 5-(2-hydroxyethyl) est | -            | -               | C17 H16 N2 O8            | 27.588                      | 376.0918    | 394.1256                  |
| 5-Megastigmen-7-yne-3,9-diol 9-glucoside                                                             | 1            | 1.8             | C19 H30 O7               | 27.589                      | 370.2003    | 393.1896                  |
| alpha-Peroxyachifolide                                                                               | 2            | 2.3             | C20 H24 O7               | 27.664                      | 376.1531    | 399.1423                  |
| (E)-2-Glucosyl-3,4',5-trihydroxystilbene                                                             | 7            | 7.1             | C20 H22 O8               | 27.739                      | 390.1323    | 413.1216                  |
| 4-Hydroxynornantenine                                                                                | 19           | -               | C19 H19 N O5             | 27.927                      | 341.1257    | 364.1147                  |
| 7,8-Didemethyl-8-hydroxy-5-deazariboflavin                                                           | -            | -               | C16 H17 N3 O7            | 27.927                      | 363.1075    | 386.0966                  |
| Viguiestenin                                                                                         | -            | -               | C21 H28 O7               | 27.952                      | 392.1824    | 393.1896                  |
| Isobutyl 2-furanpropionate                                                                           | 1            | 1.9             | C11 H16 O3               | 28.04                       | 196.1105    | 219.0998                  |
| DHAP(8:0)                                                                                            | 8            | 8.2             | C11 H21 O7 P             | 28.202                      | 296.1022    | 319.0915                  |
| Gly Arg Tyr                                                                                          | 4            | -               | C17 H26 N6 O5            | 28.202                      | 394.1983    | 395.2056                  |
| 3-(3,4-Methylene dioxyphenyl)propenal                                                                | 19           | -               | C10 H8 O3                | 28.34                       | 176.048     | 177.0553                  |
| N2-(gamma-Glutamyl)-4-carboxyphenylhydrazine                                                         | 6            | 6.1             | C12 H15 N3 O5            | 28.49                       | 281.1018    | 304.0908                  |
| Felbamate monocarboxylate                                                                            | 20           | -               | C10 H11 N O4             | 28.503                      | 209.0693    | 210.0767                  |
| 2,3-dinor Thromboxane B1                                                                             | -            | -               | C18 H32 O6               | 28.528                      | 344.2205    | 367.2099                  |
| 4-Hydroxycoumarin                                                                                    | 24           | 24.1            | C9 H6 O3                 | 28.541                      | 162.0324    | 163.0398                  |
| 3-Hydroxychavicol 1-glucoside                                                                        | 8            | 8.3             | C15 H20 O7               | 28.666                      | 312.1203    | 335.1106                  |
| Isoamyl p-anisate                                                                                    | 20           | 20.1            | C13 H18 O3               | 28.691                      | 222.126     | 223.1333                  |
| 1,3,5,8-Tetrahydroxy-6-methoxy-2-methylanthraquinone                                                 | 19           | 19.17           | C16 H12 O7               | 28.854                      | 316.0575    | 334.0914                  |
| N-(1-Deoxy-1-fructosyl)methionine                                                                    | 1            | 1.8             | C11 H21 N O7 S           | 28.854                      | 311.1025    | 312.1096                  |
| 2-Ethoxy-5-(1-propenyl)phenol                                                                        | 17           | -               | C11 H14 O2               | 29.092                      | 178.1       | 179.1073                  |
| 2-(3,4-Dihydroxyphenylethyl)-6-epi-elenaiate                                                         | 21           | 21.5            | C19 H22 O8               | 29.142                      | 378.1307    | 379.1379                  |
| 1,2-beta-D-Glucuronosyl-D-glucuronate                                                                | -            | -               | C12 H18 O13              | 29.192                      | 370.0744    | 371.0818                  |
| Cys Glu Phe                                                                                          | 4            | -               | C17 H23 N3 O6 S          | 29.242                      | 397.1317    | 415.1654                  |
| (-)-11-Hydroxy-9,15,16-trioxooctadecanoic acid                                                       | 1            | 1.4             | C18 H30 O6               | 29.367                      | 342.2052    | 365.1945                  |
| 5,6-Epoxy-5,6-dihydro-10'-apo-b,y-carotene-3,10'-diol                                                | 2            | 2.8             | C27 H38 O3               | 29.442                      | 410.2813    | 433.2706                  |
| Leu His Asn                                                                                          | 4            | -               | C16 H26 N6 O5            | 29.468                      | 382.1971    | 383.2043                  |
| Polyethylene, oxidized                                                                               | 19           | 19.23           | C12 H20 O5               | 29.568                      | 244.13      | 267.1209                  |
| 1,8-Dihydroxy-3,5-dimethoxy-2-prenylxanthone                                                         | 9            | 9.1             | C20 H20 O6               | 29.969                      | 356.1259    | 379.1141                  |
| <b>Compound</b>                                                                                      | <b>Class</b> | <b>Subclass</b> | <b>Molecular Formula</b> | <b>Retention Time (min)</b> | <b>Mass</b> | <b>Product Ions (m/z)</b> |
| PA(19:1(9Z)/0:0)                                                                                     | -            | -               | C22 H43 O7 P             | 30.094                      | 450.2737    | 451.2812                  |
| (±)-Clausenamide                                                                                     | 19           | 19.30           | C18 H19 N O3             | 30.144                      | 297.136     | 320.1252                  |
| Tryptophyl-Aspartate                                                                                 | 6            | 6.1             | C15 H17 N3 O5            | 30.194                      | 319.1178    | 342.107                   |

|                                                                                                      |              |                 |                          |                             |             |                           |
|------------------------------------------------------------------------------------------------------|--------------|-----------------|--------------------------|-----------------------------|-------------|---------------------------|
| Casimiroin                                                                                           | 14           | 14.5            | C12 H11 N O4             | 30.294                      | 233.0691    | 251.1033                  |
| epi-Tulipinolide diepoxide                                                                           | 2            | 2.3             | C17 H22 O6               | 30.394                      | 322.1402    | 323.1476                  |
| (-)-Bisdechlorogeodin                                                                                | -            | -               | C17 H14 O7               | 30.445                      | 330.0731    | 348.1069                  |
| 4R,5R,6S-Trihydroxy-2-hydroxymethyl-2-cyclohexen-1-one 6-(2-hydroxy-6-methylbenzoate)                | 20           | 20.1            | C15 H16 O7               | 30.47                       | 308.0909    | 326.1247                  |
| Galactitol 1-phosphate                                                                               | 8            | 8.3             | C6 H15 O9 P              | 30.633                      | 262.0465    | 280.0802                  |
| Erythronolide B                                                                                      | -            | -               | C21 H38 O7               | 30.695                      | 402.2619    | 425.2514                  |
| 6-Azaequilenin                                                                                       | -            | -               | C17 H17 N O2             | 30.77                       | 267.1252    | 290.1144                  |
| Propyl 1-(propylsulfinyl)propyl disulfide                                                            | 19           | -               | C9 H20 O S3              | 30.896                      | 240.0684    | 241.0751                  |
| Hulupinic acid                                                                                       | 19           | -               | C15 H20 O4               | 30.921                      | 264.1368    | 287.1261                  |
| 2-Methyl-3-(2-pentenyl)-2-cyclopenten-1-one                                                          | 8            | 8.2             | C11 H16 O                | 30.996                      | 164.1203    | 165.1276                  |
| (3R,8E)-3-Hydroxy-5,8-megastigmadien-7-one                                                           | 8            | 8.2             | C13 H20 O2               | 30.996                      | 208.1467    | 209.154                   |
| Methyl dioxindole-3-acetate                                                                          | 23           | 23.2            | C11 H11 N O4             | 31.096                      | 221.0689    | 222.0763                  |
| p-Hydroxyphenytoin glucuronide                                                                       | 19           | 19.31           | C21 H20 N2 O9            | 31.147                      | 444.1156    | 445.1227                  |
| Italipyrone                                                                                          | 20           | 20.6            | C22 H24 O7               | 31.196                      | 400.1518    | 423.1409                  |
| (+)-Ligballinol                                                                                      | 19           | -               | C18 H18 O4               | 31.334                      | 298.1203    | 321.1097                  |
| 7a-Hydroxy-O-carbamoyl-deacetylcephalosporin C                                                       | -            | -               | C15 H20 N4 O9 S          | 31.547                      | 432.0964    | 239.0372                  |
| Coumarin                                                                                             | 24           | -               | C9 H6 O2                 | 31.648                      | 146.0375    | 147.0448                  |
| (9R,10S,12Z)-9,10-Dihydroxy-8-oxo-12-octadecenoic acid                                               | 1            | 1.2             | C18 H32 O5               | 31.76                       | 328.2262    | 351.2154                  |
| Glu Thr Thr                                                                                          | 4            | -               | C13 H23 N3 O8            | 31.823                      | 349.1478    | 367.1817                  |
| Pyridine-2-azo-p-dimethylaniline                                                                     | -            | -               | C13 H14 N4               | 32.023                      | 226.1214    | 249.1107                  |
| 3,5-Pyridinedicarboxylic acid, 1,4-dihydro-2,6-dimethyl-4-(3-nitrophenyl)-, 2-hydroxyethyl methyl es | -            | -               | C18 H20 N2 O7            | 32.174                      | 376.1283    | 399.1175                  |
| 2,3-dinor Prostaglandin E1                                                                           | 1            | 1.5             | C18 H30 O5               | 32.249                      | 326.2103    | 349.1996                  |
| Alfuzosin                                                                                            | 18           | 18.1            | C19 H27 N5 O4            | 32.499                      | 389.2077    | 407.2415                  |
| 9S,10S,11R-trihydroxy-12Z-octadecenoic acid                                                          | -            | -               | C18 H34 O5               | 32.562                      | 330.2418    | 353.2311                  |
| 4-Epitetracycline                                                                                    | 13           | -               | C22 H24 N2 O8            | 32.8                        | 444.152     | 445.1593                  |
| (3b,6b,8a,12a)-8,12-Epoxy-7(11)-eremophilene-6,8,12-trimethoxy-3-ol                                  | 19           | -               | C18 H30 O5               | 32.988                      | 326.2098    | 349.1991                  |
| 3-(N-Maleimidopropionyl)-biocytin                                                                    | 19           | 19.32           | C23 H33 N5 O7 S          | 33                          | 523.2091    | 541.2419                  |
| 10-hydroxy-hexadecan-1,16-dioic acid                                                                 | -            | -               | C16 H30 O5               | 33.076                      | 302.2099    | 325.1991                  |
| Oenanthoside A                                                                                       | 8            | 8.3             | C16 H20 O8               | 33.151                      | 340.1169    | 363.1061                  |
| trans-Cinnamic acid                                                                                  | 12           | 12.3            | C9 H8 O2                 | 33.201                      | 148.0531    | 149.0603                  |
| Sulfapyridine                                                                                        | 20           | 20.5            | C11 H11 N3 O2 S          | 33.251                      | 249.0577    | 267.0913                  |
| Furcelleran                                                                                          | 12           | 12.1            | C31 H27 N O4             | 33.301                      | 477.1933    | 495.2271                  |
| Lactapiperanol D                                                                                     | 2            | 2.2             | C18 H28 O5               | 33.376                      | 324.1944    | 347.1837                  |
| 16-Methyl-epi-nigakihemiacetal B                                                                     | 2            | 2.3             | C23 H32 O6               | 33.401                      | 404.2187    | 405.2253                  |
| 2,3-dinor-8-iso-PGF2a                                                                                | -            | -               | C18 H30 O5               | 33.439                      | 326.2095    | 349.1988                  |
| Palmitic amide                                                                                       | 1            | 1.1             | C16 H33 N O              | 33.577                      | 255.2571    | 256.2645                  |
| C16 Sphinganine                                                                                      | 5            | 5.1             | C16 H35 N O2             | 33.602                      | 273.2679    | 296.2572                  |
| 15-keto-Prostaglandin E2                                                                             | 1            | 1.5             | C20 H30 O5               | 33.702                      | 350.2082    | 351.2151                  |
| Phytosphingosine                                                                                     | 5            | 5.1             | C18 H39 N O3             | 33.802                      | 317.2938    | 318.3012                  |
| 2-Hydroxyhexadecanoic acid                                                                           | -            | -               | C16 H32 O3               | 33.915                      | 272.2362    | 290.2701                  |
| Sulfadimidine                                                                                        | 20           | 20.5            | C12 H14 N4 O2 S          | 34.002                      | 278.0841    | 279.0914                  |
| 13S-HpOTrE                                                                                           | 1            | 1.2             | C18 H30 O4               | 34.078                      | 310.2154    | 333.2047                  |
| <b>Compound</b>                                                                                      | <b>Class</b> | <b>Subclass</b> | <b>Molecular Formula</b> | <b>Retention Time (min)</b> | <b>Mass</b> | <b>Product Ions (m/z)</b> |
| Imiquimod                                                                                            | 14           | 14.5            | C14 H16 N4               | 34.116                      | 240.1371    | 263.1264                  |
| Deuteroporphyrin IX                                                                                  | 10           | 10.1            | C30 H30 N4 O4            | 34.278                      | 510.2263    | 533.2153                  |
| C17 Sphinganine                                                                                      | 5            | 5.1             | C17 H37 N O2             | 34.354                      | 287.2835    | 288.2908                  |
| Coriandrone D                                                                                        | 9            | 9.2             | C18 H24 O7               | 34.403                      | 352.1533    | 375.1426                  |

| Acetyl Tyrosine Ethyl Ester                                      | -     | -        | C13 H17 N O4      | 34.454               | 251.1165 | 252.1238           |
|------------------------------------------------------------------|-------|----------|-------------------|----------------------|----------|--------------------|
| 2-Hydroxyestradiol                                               | 3     | 3.9      | C18 H24 O3        | 34.479               | 288.1731 | 311.1624           |
| Rugosinone                                                       | -     | -        | C19 H15 N O6      | 34.504               | 353.0882 | 371.1221           |
| Citrusinine I                                                    | 14    | 14.4     | C16 H15 N O5      | 34.604               | 301.0949 | 319.1291           |
| 2-Carboxy-4-dodecanolide                                         | 19    | 19.33    | C13 H22 O4        | 34.667               | 242.1527 | 265.142            |
| Letrozole                                                        | 19    | 19.4     | C17 H11 N5        | 34.855               | 285.1015 | 286.1088           |
| 3,3',4,4'-Tetrahydroxy-5,5'-diisopropyl-2,2'-dimethylbiphenyl    | 19    | 19.5     | C20 H26 O4        | 34.98                | 330.1821 | 331.1892           |
| (9Z,11E,13E,15Z)-4-Oxo-9,11,13,15-octadecatetraenoic acid        | 1     | 1.2      | C18 H26 O3        | 35.005               | 290.1895 | 291.1967           |
| Nepetaside                                                       | 2     | 2.4      | C16 H26 O8        | 35.092               | 346.1617 | 347.169            |
| Annoglabasin C                                                   | 2     | 2.2      | C23 H34 O6        | 35.105               | 406.2344 | 407.2415           |
| Dihydrocapsiate                                                  | 21    | 21.1     | C18 H28 O4        | 35.305               | 308.1995 | 331.1888           |
| 7E,10-undecadien-4-olide                                         | -     | -        | C11 H16 O2        | 35.305               | 180.1155 | 203.1048           |
| Thyrotropin releasing hormone                                    | -     | -        | C16 H22 N6 O4     | 35.506               | 362.1698 | 363.1787           |
| 8-iso Prostaglandin F1 $\beta$                                   | 1     | 1.5      | C20 H36 O5        | 35.556               | 356.2572 | 379.2466           |
| Granisetron                                                      | 19    | 19.2     | C18 H24 N4 O      | 35.706               | 312.1951 | 335.1844           |
| 6-Hydroxyenterodiol                                              | 19    | 19.34    | C18 H22 O5        | 35.757               | 318.1476 | 341.1367           |
| 15-Deacetylcalonecitrin                                          |       |          | C17 H24 O5        | 35.857               | 308.1636 | 331.153            |
| 16-phenyl-tetranor-PGE2                                          |       |          | C22 H28 O5        | 35.932               | 372.1954 | 395.1846           |
| 11 $\beta$ -Prostaglandin F1 $\beta$                             | 1     | 1.5      | C20 H36 O5        | 35.982               | 356.2565 | 379.2461           |
| 2',4'-Dihydroxy-7-methoxy-8-prenylflavan                         | 17    | 17.1     | C21 H24 O4        | 36.032               | 340.1669 | 363.156            |
| Dinor Iloprost                                                   | 1     | 1.5      | C20 H28 O4        | 36.082               | 332.1977 | 333.2047           |
| Bicuculline (+)                                                  | 19    | -        | C20 H17 N O6      | 36.107               | 367.105  | 385.139            |
| 12-Hydroxydihydrochelirubine                                     | -     | -        | C21 H17 N O6      | 36.183               | 379.1065 | 397.1404           |
| Bis(2-methylpropanoyloxy)-9,10-epoxy-p-mentha-1,3,5-triene       | 22    | -        | C18 H24 O5        | 36.22                | 320.1632 | 343.1524           |
| 3-methoxy Prostaglandin F1 $\alpha$                              | 1     | 1.5      | C21 H38 O6        | 36.458               | 386.2675 | 409.2567           |
| 9,12-dimethoxy-13-hydroxy-10-octadecenoic acid                   | -     | -        | C20 H38 O5        | 36.659               | 358.2726 | 381.262            |
| Thr Met Thr                                                      | 4     | -        | C13 H25 N3 O6 S   | 36.884               | 351.1471 | 369.1812           |
| Citronellyl alpha-toluate                                        | 1     | 1.3      | C18 H26 O2        | 37.009               | 274.194  | 275.2013           |
| beta-Zearalanol                                                  | 16    | -        | C18 H26 O5        | 37.034               | 322.1788 | 345.1681           |
| (9Z,11S,16S)-1-Acetoxy-9,17-octadecadiene-12,14-diyne-11,16-diol | 1     | 7        | C20 H28 O4        | 37.16                | 332.1979 | 333.205            |
| Rosoxacin                                                        | 14    | 14.1     | C17 H14 N2 O3     | 37.185               | 294.1013 | 295.1086           |
| Lys Ser Asp                                                      | 4     | -        | C13 H24 N4 O7     | 37.197               | 348.1641 | 349.171            |
| Maculosin                                                        | 6     | 6.1      | C14 H16 N2 O3     | 37.21                | 260.1167 | 261.124            |
| 15-methyl-15(S)-PGE1                                             | -     | -        | C21 H36 O5        | 37.598               | 368.2572 | 391.2466           |
| Horhammericine                                                   | -     | -        | C21 H24 N2 O4     | 37.836               | 368.1729 | 369.181            |
| 9-hydroperoxy-10E,12,15Z-octadecatrienoic acid                   | 1     | 1.2      | C18 H30 O4        | 37.911               | 310.215  | 333.2043           |
| 4,6'-Epoxyorotiniflavan-4-ol                                     | -     | -        | C26 H28 O6        | 38.012               | 436.1881 | 437.1955           |
| (ent-16betaOH)-16,17-Dihydroxy-9(11)-kauren-19-oic acid          | 7     | -        | C20 H30 O4        | 38.074               | 334.2136 | 335.2209           |
| (+)-Sceletium A4                                                 | -     | -        | C20 H24 N2 O2     | 38.137               | 324.1851 | 325.1924           |
| Asp Thr Val                                                      | 4     | -        | C13 H23 N3 O7     | 38.337               | 333.1529 | 351.1867           |
| 3,4-Dimethyl-5-pentyl-2-furanheptanoic acid                      | 1     | 1.4      | C18 H30 O3        | 38.412               | 294.2204 | 295.2277           |
| 15-methyl-15S-PGE2                                               | -     | -        | C21 H34 O5        | 38.525               | 366.2419 | 389.231            |
| 9-hydroxy-13-oxo-10-octadecenoic acid                            | 1     | 1.2      | C18 H32 O4        | 38.676               | 312.2313 | 335.2205           |
| Compound                                                         | Class | Subclass | Molecular Formula | Retention Time (min) | Mass     | Product Ions (m/z) |
| 3b-Hydroxy-6b-tigloyloxy-7(11)-eremophilin-12,8b-olide           | 2     | 2.3      | C20 H28 O5        | 38.713               | 348.1948 | 371.184            |
| 8-HpODE                                                          | 1     | 1.2      | C18 H32 O4        | 38.864               | 312.2308 | 335.2201           |
| Pipericoic acid                                                  | 2     | 2.5      | C22 H30 O4        | 38.926               | 358.2155 | 381.2048           |
| 1-Naphthylacetylspermine                                         | -     | -        | C22 H34 N4 O      | 39.089               | 370.2728 | 393.2621           |

| Piperochromanoic acid                                                     | 2     | 2.5      | C22 H28 O4        | 39.139               | 356.1998 | 379.1891           |
|---------------------------------------------------------------------------|-------|----------|-------------------|----------------------|----------|--------------------|
| Lyciumoside III                                                           | 2     | 2.4      | C32 H56 O13       | 39.239               | 648.3697 | 347.1743           |
| Gingerglycolipid A                                                        | 19    | 19.35    | C33 H56 O14       | 39.264               | 676.366  | 677.3735           |
| [7]-Paradol                                                               | 21    | 21.1     | C18 H28 O3        | 39.34                | 292.2048 | 315.1941           |
| 3alpha,12alpha-Dihydroxy-5beta-chola-8,14-dien-24-oic Acid                | -     | -        | C24 H36 O4        | 39.39                | 388.2595 | 389.2669           |
| Stearidonic Acid                                                          | 1     | 1.2      | C18 H28 O2        | 39.59                | 276.2101 | 277.2173           |
| 13-OxoODE                                                                 | 1     | 1.2      | C18 H30 O3        | 39.69                | 294.2205 | 317.2099           |
| (S)-3-Octanol glucoside                                                   | 1     | 1.8      | C14 H28 O6        | 39.715               | 292.1895 | 315.1788           |
| 18-Hydroxycorticosterone                                                  | 3     | 3.2      | C21 H30 O5        | 40.367               | 362.2084 | 363.2157           |
| Ganoderic acid eta                                                        | 2     | 2.6      | C30 H44 O8        | 40.417               | 532.3048 | 555.294            |
| 18:1(5Z)(9Me,13Me,17Me)                                                   | -     | -        | C21 H40 O2        | 40.43                | 324.3036 | 342.3375           |
| PI(16:1(9Z)/12:0)                                                         | -     | -        | C37 H69 O13 P     | 40.492               | 752.4464 | 377.2301           |
| Auxin b                                                                   | 2     | 2.1      | C18 H30 O4        | 40.555               | 310.2156 | 333.2046           |
| Methyl cis-p-coumarate 3-(3,7-dimethyl-2,6-octadienyl)                    | 12    | 12.1     | C20 H26 O3        | 40.68                | 314.1874 | 315.1946           |
| 9-Docosene                                                                | 19    | 19.7     | C22 H44           | 40.793               | 308.3457 | 326.3795           |
| 8-iso Prostaglandin E2 isopropyl ester                                    |       |          | C23 H38 O5        | 40.993               | 394.2701 | 395.2775           |
| Acetylenic acids; 17-Octadecen-9-ynoic acid                               | 1     | 1.4      | C18 H30 O2        | 41.181               | 278.2257 | 279.233            |
| 2-Stearyl citrate                                                         | 6     | 6.4      | C24 H44 O7        | 41.67                | 444.3074 | 445.3148           |
| Arg Ile Ile                                                               | 4     | -        | C18 H36 N6 O4     | 41.845               | 400.2811 | 401.2884           |
| Lucidenic acid A                                                          | 2     | 2.5      | C27 H38 O6        | 41.908               | 458.2679 | 481.2571           |
| Lys Val Trp                                                               | 4     | -        | C22 H33 N5 O4     | 42.321               | 431.2537 | 449.2875           |
| 13,16-Octadecadiynoic acid                                                | 1     | 1.4      | C18 H28 O2        | 42.459               | 276.21   | 277.2171           |
| Arg Pro Phe                                                               | 4     | -        | C20 H30 N6 O4     | 42.622               | 418.2336 | 419.2409           |
| Lucidenic acid N                                                          | 2     | 2.5      | C27 H40 O6        | 43.01                | 460.2833 | 483.2724           |
| 2,2-Dibutyl-3-(4-methoxyphenyl)-4-methyl-2H-1-benzopyran-7-ol acetate     | -     | -        | C27 H34 O4        | 43.123               | 422.2463 | 445.2358           |
| Diisobutyl phthalate                                                      | 20    | 20.1     | C16 H22 O4        | 43.324               | 278.1527 | 301.142            |
| Insignin A                                                                | -     | -        | C21 H32 O5        | 43.474               | 364.2261 | 387.2153           |
| 18-Oxooleate                                                              | -     | -        | C18 H32 O3        | 43.712               | 296.2361 | 319.2252           |
| 2,9-Bis(3-methyl-2E-pentenoyl)-2b,9a-dihydroxy-4Z,10(14)-oplopadien-3-one | -     | -        | C27 H38 O5        | 43.787               | 442.273  | 465.2623           |
| (25S)-5alpha-cholestan-3beta,4beta,6alpha,8beta,15alpha,16beta,26-heptol  | -     | -        | C27 H48 O7        | 44.163               | 484.3406 | 507.33             |
| Leu Trp Lys                                                               | 4     | -        | C23 H35 N5 O4     | 44.2                 | 445.2703 | 463.3042           |
| 10-F2-dihomo-IsoP                                                         | -     | -        | C23 H40 O5        | 44.301               | 396.2884 | 419.2779           |
| Montanol                                                                  | 1     | 1.4      | C21 H36 O4        | 44.363               | 352.2623 | 375.2515           |
| Deoxycorticosterone                                                       | 3     | 3.2      | C21 H30 O3        | 44.526               | 330.2179 | 331.2253           |
| 6-HpOME(7E)                                                               | -     | -        | C18 H34 O4        | 44.877               | 314.2469 | 337.2361           |
| Hexyl heptanoate                                                          | 1     | 1.9      | C35 H34 N4 O8     | 44.902               | 638.2387 | 639.246            |
| Trp Val Val                                                               | 4     | -        | C21 H30 N4 O4     | 44.977               | 402.227  | 425.2164           |
| Kammogenin                                                                | -     | -        | C27 H40 O5        | 45.14                | 444.2885 | 467.2776           |
| Polidocanol                                                               | 8     | 8.1      | C30 H62 O10       | 45.178               | 582.4344 | 605.4236           |
| 4'-O-Methylneobavaisoflavone 7-O-(2"-p-coumaroylglucoside)                | -     | -        | C36 H36 O11       | 45.328               | 644.2244 | 645.2318           |
| Glyceryl lactooleate                                                      | 1     | 1.9      | C24 H44 O6        | 45.641               | 428.313  | 429.3204           |
| 17,20-dimethyl Prostaglandin F1α                                          | 1     | 1.5      | C22 H40 O5        | 45.754               | 384.2864 | 385.2938           |
| Thromboxanoic acid skeleton                                               | -     | -        | C20 H36 O4        | 45.754               | 340.2598 | 341.2671           |
| Compound                                                                  | Class | Subclass | Molecular Formula | Retention Time (min) | Mass     | Product Ions (m/z) |
| 12(13)-EpOME                                                              | 1     | 1.4      | C18 H32 O3        | 45.804               | 296.2337 | 297.241            |
| Phaeophorbide b                                                           | 10    | 10.2     | C35 H34 N4 O6     | 45.904               | 606.2489 | 607.256            |
| AT-56                                                                     | -     | -        | C25 H27 N5        | 46.105               | 397.2264 | 398.2338           |
| 3,6-Epoxy-5,5',6,6'-tetrahydro-b,b-carotene-3',5,5',6'-tetrol             | 2     | 2.10     | C40 H58 O5        | 46.23                | 618.4309 | 619.4386           |

|                                                                                                                           |    |       |                |        |          |          |
|---------------------------------------------------------------------------------------------------------------------------|----|-------|----------------|--------|----------|----------|
| Anandamide (20:2, n-6)                                                                                                    | -  | -     | C22 H41 N O2   | 46.255 | 351.3141 | 374.3034 |
| PG(6:0/6:0)                                                                                                               | -  | -     | C18 H35 O10 P  | 46.405 | 442.1981 | 443.2057 |
| Cetiedil                                                                                                                  | 19 | -     | C20 H31 N O2 S | 46.631 | 349.2061 | 367.2399 |
| PI(13:0/0:0)                                                                                                              | -  | -     | C22 H43 O12 P  | 46.881 | 530.2501 | 531.2577 |
| Desglucocheirotol                                                                                                         | 3  | 3.3   | C29 H44 O10    | 47.007 | 552.2947 | 575.2843 |
| Terbucarb                                                                                                                 | -  | -     | C17 H27 N O2   | 47.031 | 277.2049 | 278.212  |
| 9-Pentacosene                                                                                                             | 19 | 19.36 | C25 H50        | 47.482 | 350.3914 | 368.4252 |
| Harderoporphyrin                                                                                                          | 10 | 10.1  | C35 H36 N4 O6  | 47.545 | 608.265  | 609.2725 |
| Kanokoside D                                                                                                              | 2  | 2.4   | C27 H44 O16    | 47.633 | 624.26   | 625.2675 |
| Oleamide                                                                                                                  | 1  | 1.1   | C18 H35 N O    | 47.708 | 281.2727 | 282.28   |
| 13E-Docosenamide                                                                                                          | 1  | 1.1   | C22 H43 N O    | 47.821 | 337.3354 | 338.3426 |
| Pheophorbide a                                                                                                            | -  | -     | C35 H36 N4 O5  | 48.498 | 592.2706 | 593.2782 |
| 1 $\alpha$ ,25-dihydroxy-22-oxavitamin D3 3-hemiglutarate/ 1 $\alpha$ ,25-dihydroxy-22-oxacholecalciferol 3-hemiglutarate | -  | -     | C31 H48 O7     | 48.51  | 532.3382 | 533.3456 |
| 3 $\alpha$ ,7 $\alpha$ ,12 $\alpha$ ,16 $\alpha$ -Tetrahydroxy-5 $\beta$ -cholestan-26-oic acid                           | -  | -     | C27 H46 O6     | 48.635 | 466.33   | 489.3192 |
| 23-demethylgorgosterol                                                                                                    | -  | -     | C29 H48 O      | 48.835 | 412.3708 | 413.3782 |
| Haplophytine                                                                                                              | -  | -     | C37 H40 N4 O7  | 49.537 | 652.289  | 653.2962 |

**Table S1D.** EtOAc partition [negative mode]

| Compound                                | Class | Subclass | Molecular Formula | Retention Time (min) | Mass     | Product Ions (m/z) |
|-----------------------------------------|-------|----------|-------------------|----------------------|----------|--------------------|
| 4-Oxoglutaramate                        | 19    | 19.18    | C5 H7 N O4        | 2.694                | 145.0372 | 144.0299           |
| 5-Methoxysalicylic acid                 | 20    | 20.1     | C8 H8 O4          | 9.81                 | 168.0421 | 167.0349           |
| 2,4,6-Trimethyl-3,5-dinitrobenzonitrile | -     | -        | C10 H9 N3 O4      | 10.261               | 235.0588 | 294.0727           |

|                                                                    |              |                 |                          |                             |             |                           |
|--------------------------------------------------------------------|--------------|-----------------|--------------------------|-----------------------------|-------------|---------------------------|
| 2,5-Dihydroxybenzaldehyde                                          | 20           | 20.2            | C7 H6 O3                 | 12.215                      | 138.0318    | 137.0245                  |
| Benzyl O-[arabinofuranosyl-(1->6)-glucoside]                       | 8            | 8.3             | C18 H26 O10              | 12.842                      | 402.1522    | 401.145                   |
| 4-Acetoxyphenol                                                    | 22           | -               | C8 H8 O3                 | 13.105                      | 152.0473    | 151.0401                  |
| Esculetin                                                          | 24           | 24.1            | C9 H6 O4                 | 13.118                      | 178.0268    | 177.0196                  |
| 5a,6a-Epoxy-7E-megastigmene-3b,9e-diol 9-glucoside                 | 1            | 1.8             | C19 H32 O8               | 13.243                      | 388.2093    | 433.2076                  |
| Dihydroxyphenylacetic acid                                         | 19           | 19.19           | C8 H8 O4                 | 13.293                      | 168.0422    | 167.0349                  |
| Dihydroconiferin                                                   | 8            | 8.3             | C16 H24 O8               | 13.343                      | 344.1467    | 403.1606                  |
| 3-(3-Furanyl)-2-methyl-2-propenal                                  | 19           | -               | C8 H8 O2                 | 13.368                      | 136.0522    | 135.0449                  |
| Dihydromelilotoside                                                | 8            | 8.3             | C15 H20 O8               | 13.418                      | 328.1153    | 327.1082                  |
| Vanillylmandelic acid                                              | 21           | 21.1            | C9 H10 O5                | 13.518                      | 198.0525    | 197.0452                  |
| Dihydroseoside                                                     | 1            | 1.8             | C19 H32 O8               | 13.944                      | 388.2092    | 433.2074                  |
| 2-Hydroxycinnamic acid                                             | 12           | 12.2            | C9 H8 O3                 | 13.969                      | 164.0471    | 163.0398                  |
| Samin                                                              | 19           | -               | C13 H14 O5               | 14.02                       | 250.0838    | 249.0769                  |
| Picrotoxinin                                                       | 19           | -               | C15 H16 O6               | 14.145                      | 292.0942    | 291.0868                  |
| 3,4-Dihydroxybenzaldehyde                                          | 8            | 8.2             | C7 H6 O3                 | 14.17                       | 138.0315    | 137.0242                  |
| Bacteriocin 28b                                                    | 6            | 6.1             | C12 H11 N3 O2            | 14.245                      | 229.0849    | 274.0831                  |
| 4-Hydroxybenzaldehyde                                              | 8            | 8.2             | C7 H6 O2                 | 14.32                       | 122.0369    | 121.0296                  |
| Corchoionol C 9-glucoside                                          | 1            | 1.8             | C19 H30 O8               | 14.345                      | 386.1937    | 431.1917                  |
| Phenylethyl primeveroside                                          | 8            | 8.3             | C19 H28 O10              | 14.37                       | 416.1677    | 415.1605                  |
| (-)-11-hydroxy-9,10-dihydrojasmonic acid 11-beta-D-glucoside       | -            | -               | C18 H30 O9               | 14.621                      | 390.1883    | 449.2022                  |
| Rutin                                                              | 17           | 17.2            | C27 H30 O16              | 14.922                      | 610.1522    | 609.1448                  |
| 5-(3,4-Dihydroxyphenyl)-5-ethylbarbituric acid                     | -            | -               | C12 H12 N2 O5            | 15.022                      | 264.0744    | 323.0882                  |
| 3-Hydroxycoumarin                                                  | 24           | 24.1            | C9 H6 O3                 | 15.047                      | 162.0315    | 161.0242                  |
| Methyl 2,6-dihydroxy-4-quinolinecarboxylate                        | 14           | 14.3            | C11 H9 N O4              | 15.347                      | 219.0529    | 218.0457                  |
| ethyl 6,7-dimethoxy-4-oxo-2,3-dihydro-1H-naphthalene-2-carboxylate | -            | -               | C15 H18 O5               | 15.423                      | 278.1151    | 323.1134                  |
| Vitexin 4'-O-galactoside                                           | 17           | 17.2            | C27 H30 O15              | 15.523                      | 594.1574    | 593.1502                  |
| Blumenol C glucoside                                               | 1            | 1.8             | C19 H32 O7               | 15.623                      | 372.2144    | 417.2127                  |
| Propanoic acid, 2-hydroxy-3-[2-(2-propenyloxy)phenoxy]-            | -            | -               | C12 H14 O5               | 15.748                      | 238.0839    | 237.0767                  |
| 6-C-Xylopyranosyl-8-C-glucopyranosylchrysoeriol                    | -            | -               | C27 H30 O15              | 15.824                      | 594.1571    | 593.1498                  |
| Ethyl 7-epi-12-hydroxyjasmonate glucoside                          | 1            | 1.8             | C20 H32 O9               | 16.036                      | 416.2043    | 415.197                   |
| Ferulic acid                                                       | 12           | 12.2            | C10 H10 O4               | 16.074                      | 194.0579    | 193.0506                  |
| 2,6-Dihydroxynicotinate                                            | 19           | 19.14           | C6 H5 N O4               | 16.275                      | 155.0218    | 154.0146                  |
| 9-Hydroxy-7-megastigmen-3-one glucoside                            | 1            | 1.8             | C19 H32 O7               | 16.5                        | 372.2151    | 417.2134                  |
| Scytalone                                                          | -            | -               | C10 H10 O4               | 16.55                       | 194.0579    | 193.0507                  |
| Phenylacetone nitrile                                              | 8            | -               | C8 H7 N                  | 17.214                      | 117.0579    | 116.0507                  |
| 3-Hydroxyisoheptanoic acid                                         | 19           | 19.20           | C7 H14 O3                | 17.227                      | 146.0941    | 145.0869                  |
| Methyl N-(a-methylbutyryl)glycine                                  | 1            | 1.4             | C9 H16 O4                | 17.427                      | 188.1051    | 187.0979                  |
| 4-formyl Indole                                                    | -            | -               | C9 H7 N O                | 17.527                      | 145.0531    | 144.0459                  |
| m-Coumaric acid                                                    | 12           | 12.2            | C9 H8 O3                 | 17.803                      | 164.0475    | 163.0402                  |
| xi-2,3-Octadiene-5,7-diyn-1-ol                                     | 1            | 1.7             | C8 H6 O                  | 17.828                      | 118.0418    | 117.0346                  |
| <b>Compound</b>                                                    | <b>Class</b> | <b>Subclass</b> | <b>Molecular Formula</b> | <b>Retention Time (min)</b> | <b>Mass</b> | <b>Product Ions (m/z)</b> |
| (-)-11-hydroxy-9,10-dihydrojasmonic acid                           | 1            | 1.2             | C12 H20 O4               | 17.953                      | 228.1361    | 227.1289                  |
| Naproxen glucuronide                                               | 8            | 8.3             | C20 H22 O9               | 17.978                      | 406.126     | 405.1188                  |
| 2-Phthalimidoglutaramic acid                                       | 1            | 1.4             | C13 H12 N2 O5            | 18.179                      | 276.0743    | 321.0724                  |
| Grandisine III                                                     | 14           | 14.4            | C15 H13 N O5             | 18.228                      | 287.0789    | 332.0772                  |



|                                                                                |    |       |                |        |          |          |
|--------------------------------------------------------------------------------|----|-------|----------------|--------|----------|----------|
| Homovanillic acid                                                              | 21 | 21.1  | C9 H10 O4      | 18.354 | 182.0577 | 181.0504 |
| N-(3-oxo-octanoyl)-homoserine lactone                                          | 6  | 6.1   | C12 H19 N O4   | 18.454 | 241.1311 | 240.124  |
| Asp-Gly-OH                                                                     | 6  | 6.1   | C11 H10 N2 O8  | 18.655 | 298.0452 | 297.0379 |
| (3S,7E,9S)-9-Hydroxy-4,7-megastigmadien-3-one 9-glucoside                      | 1  | 1.8   | C19 H30 O7     | 18.93  | 370.1986 | 415.1968 |
| 4-Nitrophenol                                                                  | 21 | 21.2  | C6 H5 N O3     | 19.181 | 139.0273 | 138.02   |
| Mundoserone                                                                    | -  | -     | C19 H18 O6     | 19.356 | 342.11   | 341.1028 |
| Absciscic Acid (cis,trans)                                                     | 2  | 2.5   | C15 H20 O4     | 19.432 | 264.1359 | 263.1286 |
| 1-(3,4-Dihydroxyphenyl)-7-(4-hydroxy-3-methoxyphenyl)-1,6-heptadiene-3,5-dione | 19 | 19.3  | C20 H18 O6     | 19.444 | 354.1119 | 353.1048 |
| 2-Methyl-1-phenyl-2-propanyl butyrate                                          | 8  | 8.3   | C14 H20 O2     | 19.456 | 220.1459 | 219.1386 |
| 5,7,4'-Trihydroxy-3'-methoxyflavanone 4'-O-isobutyrate                         | -  | -     | C20 H20 O7     | 19.532 | 372.1204 | 371.1132 |
| Sebacic acid                                                                   | 1  | 1.4   | C10 H18 O4     | 19.632 | 202.1202 | 201.1129 |
| Distichonic acid B                                                             | 6  | 6.1   | C10 H18 N2 O8  | 20.884 | 294.1076 | 223.0949 |
| Tuberonic acid                                                                 | 6  | 6.1   | C12 H18 O4     | 20.885 | 226.1207 | 293.1002 |
| Ethoprop                                                                       | 19 | -     | C8 H19 O2 P S2 | 21.16  | 242.0563 | 225.1134 |
| His Ile Gln                                                                    | 4  | -     | C17 H28 N6 O5  | 21.361 | 396.2122 | 241.049  |
| 9,12,13-trihydroxy-10,15-octadecadienoic acid                                  | 1  | 1.4   | C18 H32 O5     | 21.636 | 328.2251 | 327.2179 |
| 2,3-Dinor-11b-PGF2a                                                            | 1  | 1.5   | C18 H30 O5     | 21.674 | 326.2092 | 325.202  |
| Amlexanox                                                                      | 9  | 9.1   | C16 H14 N2 O4  | 21.862 | 298.0947 | 269.1028 |
| Aspidinol                                                                      | 21 | 21.3  | C12 H16 O4     | 22.388 | 224.1048 | 297.0879 |
| 11,12,13-trihydroxy-9-octadecenoic acid                                        | 1  | 1.4   | C18 H34 O5     | 22.438 | 330.241  | 223.0975 |
| 7-Ethyl-2R-methyl-1,6-dioxaspiro[4.5]decane                                    | 1  | 1.4   | C11 H20 O2     | 22.952 | 184.1465 | 329.2337 |
| 9-hydroxy-hexadecan-1,16-dioic acid                                            | -  | -     | C16 H30 O5     | 23.064 | 302.2093 | 183.1392 |
| Traumatic Acid                                                                 | 1  | 1.4   | C12 H20 O4     | 23.127 | 228.1361 | 301.2022 |
| 4'-Hydroxyfenopropfen                                                          | 20 | 20.4  | C15 H14 O4     | 23.34  | 258.0891 | 227.1289 |
| 3,12-dihydroxy palmitic acid                                                   | 1  | 1.4   | C16 H32 O4     | 23.365 | 288.2298 | 257.0818 |
| Isoplumbagin                                                                   | 19 | 19.21 | C11 H8 O3      | 23.39  | 188.0471 | 287.2226 |
| 3-Methylindolepyruvate                                                         | 19 | 19.22 | C12 H11 N O3   | 23.503 | 217.0738 | 187.0398 |
| N-methyl-Gabapentin                                                            | 6  | 6.1   | C10 H19 N O2   | 23.766 | 185.1414 | 184.1341 |
| 3,7-Dimethyl-2E,6-octadienyl acetate                                           | -  | -     | C12 H20 O2     | 24.004 | 196.1464 | 195.1391 |
| (E)-2-Hexenyl (E)-7,9-decadienoate                                             | -  | -     | C16 H26 O2     | 24.443 | 250.1933 | 309.2069 |
| Gibberellin A65                                                                | 2  | 2.2   | C20 H26 O6     | 24.793 | 362.1734 | 361.1661 |
| 5-Hydroxy-4-methoxy-3-methyl-2,6-canthinedione                                 | 11 | -     | C16 H12 N2 O4  | 25.345 | 296.0795 | 295.0722 |
| 5-O-Methylembelin                                                              | 2  | 2.7   | C18 H28 O4     | 25.495 | 308.1991 | 307.1918 |
| Methylgingerol                                                                 | 8  | 8.2   | C18 H28 O4     | 25.946 | 308.1984 | 307.1911 |
| 3-(2-Hydroxyphenyl)propionic acid                                              | 19 | -     | C9 H10 O3      | 26.196 | 166.0629 | 165.0556 |
| Lagochilin                                                                     | 3  | 3.7   | C20 H36 O5     | 26.46  | 356.2558 | 355.2486 |
| Mangostenone B                                                                 | 9  | 9.1   | C28 H30 O6     | 26.547 | 462.2033 | 507.2015 |
| Methylprednisone                                                               | 3  | 3.2   | C22 H28 O5     | 26.648 | 372.1935 | 371.1864 |
| Inulicin                                                                       | 2  | 2.3   | C17 H24 O5     | 26.71  | 308.1622 | 307.1549 |
| Gibberellin A3                                                                 | 2  | 2.2   | C19 H22 O6     | 27.048 | 346.1416 | 345.1343 |

**Table S2.** List of compounds identified in *R. nasutus* callus extract by UHPLC-QToF-MS analysis

**Table S2A.** Hexane partition [positive mode]

| Compound     | Class | Subclass | Molecular Formula | Retention Time (min) | Mass     | Product Ions (m/z) |
|--------------|-------|----------|-------------------|----------------------|----------|--------------------|
| Theophylline | 26    | 26.1     | C7 H8 N4 O2       | 2.012                | 180.0644 | 203.0536           |

| Anhalonidine                                                       | -     | -        | C12 H17 N O3      | 2.714                | 223.1218 | 224.1291           |
|--------------------------------------------------------------------|-------|----------|-------------------|----------------------|----------|--------------------|
| Dikegulac                                                          | -     | -        | C12 H18 O7        | 3.265                | 274.1047 | 275.1121           |
| Methyl red                                                         | 19    | -        | C15 H15 N3 O2     | 6.422                | 269.1176 | 270.1249           |
| Sudan I                                                            | 29    | 29.1     | C16 H12 N2 O      | 10.406               | 248.0962 | 266.13             |
| PE-Cer(d14:2(4E,6E)/ 20:1(11Z)(2OH))                               | -     | -        | C36 H69 N2 O7 P   | 16.469               | 672.4874 | 359.233            |
| Pentyl heptanoate                                                  | 1     | 1.9      | C12 H24 O2        | 17.021               | 200.1786 | 218.2124           |
| Desmethylelbergometrine                                            | -     | -        | C18 H21 N3 O2     | 17.346               | 311.1647 | 312.172            |
| Sapidolide A                                                       | 31    | 31.1     | C14 H18 O5        | 17.622               | 266.1146 | 267.1217           |
| Asn Arg Ala                                                        | 4     | -        | C13 H25 N7 O5     | 19.126               | 359.191  | 382.18             |
| Citrovirenone                                                      | 21    | 21.1     | C14 H16 O4        | 20.729               | 248.1041 | 249.1113           |
| 4-Ethyl-2-heptylthiazole                                           | 32    | 32.1     | C12 H21 N S       | 21.456               | 211.1403 | 234.1293           |
| His Glu Lys                                                        | 4     | -        | C17 H28 N6 O6     | 21.531               | 412.2066 | 413.214            |
| Bisbynin                                                           | 19    | -        | C15 H22 O5        | 21.656               | 282.1454 | 283.1527           |
| Ser Arg Pro                                                        | 4     | -        | C14 H26 N6 O5     | 21.681               | 358.1979 | 359.2053           |
| Indirubin-3'-monoxime                                              | 23    | 23.3     | C16 H11 N3 O2     | 22.684               | 277.0839 | 278.0912           |
| (4E,8E,10E-d18:3) sphingosine                                      | -     | -        | C18 H33 N O2      | 24.262               | 295.2504 | 296.2578           |
| C16 Sphinganine                                                    | 5     | 5.1      | C16 H35 N O2      | 24.487               | 273.2674 | 296.2566           |
| 3-Oxopregn-4-ene-20beta-carboxaldehyde dioxime                     | -     | -        | C22 H34 N2 O2     | 25.026               | 358.2635 | 359.2708           |
| 2,3-dinor Prostaglandin E1                                         | 1     | 1.5      | C18 H30 O5        | 25.527               | 326.2097 | 349.1989           |
| Gibberellin A97                                                    | 2     | 2.2      | C20 H28 O6        | 25.715               | 364.1879 | 365.1948           |
| 2,3-dinor Thromboxane B1                                           | 1     | -        | C18 H32 O6        | 26.166               | 344.2206 | 367.2099           |
| (-)-11-Hydroxy-9,15,16-trioxooctadecanoic acid                     | 1     | 1.4      | C18 H30 O6        | 26.279               | 342.2051 | 365.1944           |
| Sodium glycocholate                                                | 3     | 3.1      | C26 H43 N O6      | 26.391               | 465.3092 | 466.3166           |
| Geranyl acetoacetate                                               | 1     | -        | C18 H32 O6        | 26.467               | 344.2205 | 367.2097           |
| Corrinoid                                                          | -     | -        | C14 H22 O3        | 26.542               | 238.158  | 261.1472           |
| 6,8-Dihydroxy-1,7-diprenylxanthone-2-carboxylic acid               | 9     | 9.1      | C24 H24 O6        | 26.98                | 408.1569 | 409.1644           |
| 6-Epi-7-isocucurbitic acid glucoside                               | 1     | 1.8      | C18 H30 O8        | 27.043               | 374.1949 | 397.1841           |
| Melochinone                                                        | -     | -        | C22 H21 N O2      | 27.419               | 331.1569 | 349.1907           |
| (9Z,11S,16S)-1-Acetoxy-9,17-octadecadiene-12,14-diyne-11,16-diol   | 1     | 1.7      | C20 H28 O4        | 27.457               | 332.1984 | 333.2055           |
| 6-Deoxyerythronolide B                                             | -     | -        | C21 H38 O6        | 27.87                | 386.267  | 409.2563           |
| (ent-16betaOH)-16,17-Dihydroxy-9(11)-kauren-19-oic acid            | 7     | -        | C20 H30 O4        | 28.046               | 334.2141 | 335.2214           |
| 6-Hydroxyenterodiol                                                | 19    | 19.37    | C18 H22 O5        | 28.271               | 318.1477 | 341.1367           |
| Cypendazole                                                        | -     | -        | C16 H19 N5 O3     | 28.371               | 329.1489 | 347.1842           |
| 12(S)-HpEPE                                                        | -     | -        | C20 H30 O4        | 28.471               | 334.2134 | 335.2206           |
| 3,3',4,4'-Tetrahydroxy-5,5'-diisopropyl-2,2'-dimethylbiphenyl      | 20    | 20.7     | C20 H26 O4        | 29.248               | 330.1827 | 331.19             |
| 9-hydroxy-13-oxo-10-octadecenoic acid                              | 1     | 1.2      | C18 H32 O4        | 29.498               | 312.2309 | 335.2201           |
| 4,6'-Epoxyorotiniflavan-4-ol                                       | 17    | 17.1     | C26 H28 O6        | 29.599               | 436.1878 | 437.1951           |
| 2,2-Dimethyl-3,4-bis(4-methoxyphenyl)-2H-1-benzopyran-7-ol acetate | -     | -        | C27 H26 O5        | 29.699               | 430.1791 | 453.1687           |
| 6-HpOME(7E)                                                        | -     | -        | C18 H34 O4        | 29.899               | 314.2469 | 337.2362           |
| Glycyl-Glutamate                                                   | 4     | -        | C7 H12 N2 O5      | 30.476               | 204.0753 | 227.0648           |
| Picrasin F                                                         | -     | -        | C22 H30 O8        | 30.551               | 422.1935 | 423.2008           |
| Alfuzosin                                                          | 18    | 18.1     | C19 H27 N5 O4     | 30.601               | 389.2073 | 407.2417           |
| (ent-16betaOH)-16,17-Dihydroxy-9(11)-kauren-19-oic acid            | 19    | 19.13    | C20 H30 O4        | 30.726               | 334.2143 | 335.2214           |
| Compound                                                           | Class | Subclass | Molecular Formula | Retention Time (min) | Mass     | Product Ions (m/z) |
| N-(14-Methylhexadecanoyl) pyrrolidine                              | 6     | 6.3      | C21 H41 N O       | 31.002               | 323.3203 | 341.3541           |
| Oryzalic acid B                                                    | 4     | -        | C20 H30 O5        | 31.077               | 350.2087 | 351.2162           |
| 7-Hydroxyenterolactone                                             | 19    | 19.38    | C18 H18 O5        | 31.703               | 314.1165 | 337.1057           |
| ox-LGD2                                                            | -     | -        | C20 H30 O6        | 31.854               | 366.2033 | 367.2108           |
| Ser Val Gln                                                        | 4     | -        | C13 H24 N4 O6     | 32.242               | 332.1684 | 333.1755           |

| 3-methoxy Prostaglandin F1 $\alpha$                                                                                     | 1     | 1.5      | C21 H38 O6        | 32.468               | 386.2678 | 409.2572           |
|-------------------------------------------------------------------------------------------------------------------------|-------|----------|-------------------|----------------------|----------|--------------------|
| 15-methyl-15(S)-PGE1                                                                                                    | -     | -        | C21 H36 O5        | 32.505               | 368.2567 | 391.2464           |
| Cryptomeridiol 11-rhamnoside                                                                                            | 2     | 2.5      | C21 H38 O6        | 32.705               | 386.2668 | 409.2567           |
| Gentamicin                                                                                                              | 8     | 8.3      | C21 H43 N5 O7     | 33.32                | 477.3161 | 478.3235           |
| 5beta-Chola-3,11-dien-24-oic Acid                                                                                       | -     | -        | C24 H36 O2        | 33.407               | 356.2725 | 357.2798           |
| [7]-Paradol                                                                                                             | 21    | 21.1     | C18 H28 O3        | 33.42                | 292.2038 | 315.1944           |
| 8-iso Prostaglandin E2 isopropyl ester                                                                                  | 6     | 6.1      | C23 H38 O5        | 33.608               | 394.2704 | 395.2778           |
| Thr Glu Leu                                                                                                             | 4     | -        | C15 H27 N3 O7     | 33.808               | 361.1846 | 362.1918           |
| 2-Methyl-1-phenyl-2-propanyl butyrate                                                                                   | 20    | 20.3     | C14 H20 O2        | 33.959               | 220.147  | 243.1362           |
| Sterol 3-beta-D-glucoside                                                                                               | 2     | 2.6      | C23 H38 O6        | 33.984               | 410.2658 | 411.2731           |
| Asp Gly Lys                                                                                                             | 4     | -        | C12 H22 N4 O6     | 34.222               | 318.1528 | 341.1419           |
| Gln Val Ala                                                                                                             | 4     | -        | C13 H24 N4 O5     | 34.359               | 316.1736 | 317.1807           |
| Ser Lys Thr                                                                                                             | 4     | -        | C13 H26 N4 O6     | 34.384               | 334.184  | 335.1913           |
| PGF2 $\alpha$ -11-acetate methyl ester                                                                                  | 6     | 6.5      | C23 H38 O6        | 34.46                | 410.2669 | 411.2743           |
| 7-Methylrosmanol                                                                                                        | 2     | 2.3      | C21 H28 O5        | 34.485               | 360.1939 | 361.2012           |
| 11 $\beta$ -Prostaglandin F1 $\beta$                                                                                    | 1     | 1.5      | C20 H36 O5        | 34.56                | 356.2557 | 357.263            |
| 8-HpODE                                                                                                                 | -     | -        | C18 H32 O4        | 34.56                | 312.2288 | 313.2361           |
| Dihydroisoalantolactone                                                                                                 | 2     | 2.3      | C15 H22 O2        | 34.71                | 234.163  | 235.1703           |
| Phe Tyr Lys                                                                                                             | 4     | -        | C24 H32 N4 O5     | 34.785               | 456.2363 | 457.2437           |
| 1-Naphthylacetylspermine                                                                                                | -     | -        | C22 H34 N4 O      | 34.91                | 370.2725 | 393.2618           |
| Acetylenic acids; 17-Octadecen-9-ynoic acid                                                                             | -     | -        | C18 H30 O2        | 34.936               | 278.2258 | 279.2332           |
| 3,4-Dimethyl-5-pentyl-2-furanheptanoic acid                                                                             | 1     | 1.4      | C18 H30 O3        | 35.199               | 294.2207 | 295.228            |
| Samandenone                                                                                                             | -     | -        | C22 H33 N O2      | 35.587               | 343.2505 | 344.2578           |
| Stearidonic Acid                                                                                                        | 1     | 1.2      | C18 H28 O2        | 35.687               | 276.21   | 277.2173           |
| PA(17:2(9Z,12Z)/0:0)                                                                                                    | -     | -        | C20 H37 O7 P      | 35.763               | 420.2273 | 421.2347           |
| 13-OxoODE                                                                                                               | 1     | 1.2      | C18H30O3          | 35.788               | 294.2204 | 317.2096           |
| 3',4'-Methylenedioxy- $\alpha$ -pyrrolidinobutiophenone                                                                 | -     | -        | C15 H19 N O3      | 36.113               | 261.1361 | 262.1435           |
| Methabenzthiazuron                                                                                                      | -     | -        | C10 H11 N3 O S    | 36.565               | 221.063  | 239.0965           |
| Istamycin KL1                                                                                                           | -     | -        | C13 H28 N4 O6     | 36.589               | 336.1996 | 337.207            |
| Benzthiazuron                                                                                                           | -     | -        | C9 H9 N3 O S      | 36.99                | 207.0474 | 225.081            |
| Ergine                                                                                                                  | -     | -        | C16 H17 N3 O      | 37.09                | 267.1366 | 285.1711           |
| Methyl [8]-Shogaol                                                                                                      | 20    | 20.8     | C20 H30 O3        | 37.216               | 318.2187 | 319.226            |
| Nonoxynol-9                                                                                                             | 8     | 8.1      | C33 H60 O10       | 37.516               | 616.4197 | 639.4091           |
| Ethyl 1-(ethylthio) propyl disulfide                                                                                    | 19    | 19.39    | C7 H16 S3         | 37.616               | 196.0422 | 197.0493           |
| 12R-HODE                                                                                                                | -     | -        | C18 H32 O3        | 37.78                | 296.2364 | 319.2258           |
| Iriomoteolide 1a                                                                                                        | -     | -        | C29 H46 O7        | 38.093               | 506.3235 | 507.3309           |
| 3-dehydroecdysone                                                                                                       | -     | -        | C27 H42 O6        | 38.181               | 462.2973 | 463.3048           |
| 10-F2-dihomo-IsoP                                                                                                       | -     | -        | C23 H40 O5        | 38.205               | 396.2889 | 419.2782           |
| (25S)-5alpha-cholestan-3beta,4beta,6alpha,8beta,15alpha,16beta,26-heptol                                                | -     | -        | C27 H48 O7        | 38.318               | 484.3401 | 507.3296           |
| Lucidenic acid M                                                                                                        | 17    | 17.4     | C27 H42 O6        | 38.456               | 462.2981 | 463.3056           |
| Cavipetin D                                                                                                             | 2     | 2.2      | C25 H38 O5        | 38.481               | 418.2718 | 419.2792           |
| Androst-4-ene-3alpha,17beta-diol diacetate                                                                              | -     | -        | C23 H34 O4        | 38.506               | 374.2455 | 375.2529           |
| Deoxycorticosterone                                                                                                     | 3     | 3.2      | C21 H30 O3        | 38.644               | 330.2189 | 331.2263           |
| (22E,24R)-Stigmasta-4,22-diene-3,6-dione                                                                                | 3     | 3.4      | C29 H44 O2        | 39.396               | 424.3352 | 425.342            |
| Compound                                                                                                                | Class | Subclass | Molecular Formula | Retention Time (min) | Mass     | Product Ions (m/z) |
| 2-(Methoxycarbonyl)-5-methyl-2,4-bis(3-methyl-2-butenyl)-6-(2-methyl-1-oxopropyl)-5-(4-methyl-3-pentenyl) cyclohexanone | 2     | 2.1      | C29 H46 O4        | 39.521               | 458.3392 | 481.3285           |
| CB-13                                                                                                                   | -     | -        | C26 H24 O2        | 39.521               | 368.1793 | 391.1682           |

|                                                                                                                                                                                                |              |                 |                              |                                 |             |                               |
|------------------------------------------------------------------------------------------------------------------------------------------------------------------------------------------------|--------------|-----------------|------------------------------|---------------------------------|-------------|-------------------------------|
| 23-demethylgorgosterol                                                                                                                                                                         | -            | -               | C29 H48 O                    | 39.596                          | 412.3711    | 413.3786                      |
| 14,15-HxA3 (11S)                                                                                                                                                                               | -            | -               | C20 H32 O4                   | 39.671                          | 336.2296    | 337.237                       |
| Glyceryl lactopalmitate                                                                                                                                                                        | 32           | 32.2            | C20 H16 N6 O2 S              | 39.897                          | 404.1063    | 422.14                        |
| Glyceryl lactooleate                                                                                                                                                                           | 1            | 1.9             | C24 H44 O6                   | 39.922                          | 428.3129    | 429.3204                      |
| (2alpha,3alpha,5alpha,22R,23R)-<br>2,3,22,23-Tetrahydroxy-25-<br>methylergost-24(28)en-6-one                                                                                                   | 3            | 3.1             | C29 H48 O5                   | 40.022                          | 476.3517    | 499.3409                      |
| 8beta-Angeloyloxy-15-hydroxy-<br>1alpha,10R-dimethoxy-3-oxo-11(13)-<br>germacren-12,6alpha-olide                                                                                               | 2            | 2.3             | C22 H32 O8                   | 40.122                          | 424.2095    | 425.2169                      |
| Thromboxanoic acid skeleton                                                                                                                                                                    | -            | -               | C20 H36 O4                   | 40.135                          | 340.2613    | 341.2686                      |
| 17,20-dimethyl Prostaglandin F1α                                                                                                                                                               | -            | -               | C22 H40 O5                   | 40.147                          | 384.2875    | 385.2948                      |
| Docosatetraenoyl Ethanolamide                                                                                                                                                                  | 5            | 5.1             | C24 H41 N O2                 | 40.235                          | 375.3134    | 376.3208                      |
| 12(13)-EpOME                                                                                                                                                                                   | 1            | 1.4             | C18 H32 O3                   | 40.298                          | 296.2347    | 297.2421                      |
| 1α-hydroxy-22-[3-(1-hydroxy-1-<br>methylethyl)phenyl]-23,24,25,26,27-<br>pentanorvitamin D3 / 1α-hydroxy-22-<br>[3-(1-hydroxy-1-methylethyl)phenyl]-<br>23,24,25,26,27-pentanorcholecalciferol | -            | -               | C31 H44 O3                   | 40.46                           | 464.3281    | 465.3355                      |
| N,N-(2,2-dihydroxy-ethyl)<br>arachidonoyl amine                                                                                                                                                | -            | -               | C24 H41 N O3                 | 40.674                          | 391.3085    | 392.3159                      |
| Uscharidin                                                                                                                                                                                     | -            | -               | C29 H38 O9                   | 40.699                          | 530.2521    | 531.2595                      |
| Arg Lys Phe                                                                                                                                                                                    | 4            | -               | C21 H35 N7 O4                | 40.799                          | 449.2764    | 450.283                       |
| Desglucocheirotaxol                                                                                                                                                                            | 3            | 3.3             | C29 H44 O10                  | 40.824                          | 552.2939    | 575.2835                      |
| Piperidine                                                                                                                                                                                     | 1            | 1.1             | C22 H41 N O                  | 40.924                          | 335.32      | 336.3273                      |
| PG(O-18:0/0:0)                                                                                                                                                                                 | -            | -               | C24 H51 O8 P                 | 41.438                          | 498.333     | 499.3404                      |
| Camelidionol                                                                                                                                                                                   | 2            | 2.6             | C29 H44 O3                   | 41.475                          | 440.3307    | 441.3373                      |
| Arachidonoylmorpholine                                                                                                                                                                         | -            | -               | C24 H39 N O2                 | 41.576                          | 373.2972    | 374.3046                      |
| 3-Epimastigadienolic acid                                                                                                                                                                      | 2            | 2.6             | C30 H48 O3                   | 41.625                          | 456.3615    | 479.3508                      |
| Oleic Acid ethyl ester                                                                                                                                                                         | -            | -               | C20 H38 O2                   | 41.776                          | 310.2882    | 311.2956                      |
| 1-Oleoyl-2-acetyl-sn-glycerol                                                                                                                                                                  | -            | -               | C23 H42 O5                   | 41.813                          | 398.3016    | 399.309                       |
| AT-56                                                                                                                                                                                          | -            | -               | C25 H27 N5                   | 42.052                          | 397.2271    | 420.2164                      |
| Methyl acetyl ricinoleate                                                                                                                                                                      | -            | -               | C21 H38 O4                   | 42.152                          | 354.2758    | 355.2831                      |
| ent-8-deoxy-J2-IsoP                                                                                                                                                                            | -            | -               | C20 H28 O3                   | 42.327                          | 316.2031    | 317.2104                      |
| Cetiedil                                                                                                                                                                                       | 19           | -               | C20 H31 N O2 S               | 42.527                          | 349.2068    | 367.2407                      |
| (ent-2b,4S,9a)-2,4,9-<br>Trihydroxy-10(14)-oplopen-3-one<br>2-(2-methylbutanoate) 9-<br>(3-methyl-2E-pentenoate)                                                                               | 2            | 2.5             | C26 H40 O6                   | 42.628                          | 448.2828    | 449.29                        |
| 3-beta-hydroxy-4-beta-methyl-5-alpha-<br>cholest-7-ene-4-alpha-carbaldehyde                                                                                                                    | 3            | 3.5             | C29 H48 O2                   | 42.979                          | 428.3666    | 429.3739                      |
| Austroinulin                                                                                                                                                                                   | 2            | 2.2             | C20 H34 O3                   | 43.104                          | 322.2513    | 345.2411                      |
| 5,8-Dihydro-6-(4-methyl-3-pentenyl)-<br>1,2,3,4-tetrathiocin                                                                                                                                   | -            | -               | C10 H16 S4                   | 43.229                          | 264.0124    | 282.0463                      |
| Oleamide                                                                                                                                                                                       | 1            | 1.1             | C18 H35 N O                  | 43.38                           | 281.2727    | 282.2798                      |
| Chabrosterol                                                                                                                                                                                   | -            | -               | C27 H42 O2                   | 43.405                          | 398.3189    | 399.3262                      |
| Lucidone C                                                                                                                                                                                     | 3            | 3.10            | C24 H36 O5                   | 43.505                          | 404.2571    | 427.2463                      |
| <b>Compound</b>                                                                                                                                                                                | <b>Class</b> | <b>Subclass</b> | <b>Molecular<br/>Formula</b> | <b>Retention<br/>Time (min)</b> | <b>Mass</b> | <b>Product<br/>Ions (m/z)</b> |
| Quercetin 3-(2"-p-hydroxybenzoyl-4"-p-<br>coumaryl)rhamsoside)                                                                                                                                 | 17           | 17.5            | C37 H30 O15                  | 43.831                          | 714.1557    | 715.1633                      |
| Sorbitan palmitate                                                                                                                                                                             | 1            | 1.9             | C22 H42 O6                   | 43.906                          | 402.2985    | 425.2874                      |
| Anandamide (20:l, n-9)                                                                                                                                                                         | -            | -               | C22 H43 N O2                 | 44.319                          | 353.3296    | 376.3198                      |

| 7-Ketodeoxycholic acid                                                                                                              | 3     | 3.1      | C24 H38 O5        | 44.332               | 406.2714 | 407.2788           |
|-------------------------------------------------------------------------------------------------------------------------------------|-------|----------|-------------------|----------------------|----------|--------------------|
| Diltiazem                                                                                                                           | 19    | -        | C22 H26 N2 O4 S   | 44.532               | 414.1613 | 432.1957           |
| Schleicherastatin 3                                                                                                                 | 3     | 3.1      | C29 H50 O3        | 44.569               | 446.3767 | 469.366            |
| Octadecyl fumarate                                                                                                                  | 1     | 1.9      | C22 H40 O4        | 45.046               | 368.2924 | 369.2998           |
| Glaucasterol                                                                                                                        | -     | -        | C27 H42 O         | 45.208               | 382.3251 | 383.3324           |
| Stearoylethanolamide                                                                                                                | 5     | 5.1      | C20 H41 N O2      | 45.233               | 327.3153 | 328.3226           |
| (24E)-3alpha-Acetoxy-15alpha,22S-dihydroxylanosta-7,9(11),24-trien-26-oic acid                                                      | 2     | 2.6      | C32 H48 O6        | 45.234               | 528.3448 | 529.3514           |
| Cabergoline                                                                                                                         | 19    | 19.40    | C26 H37 N5 O2     | 45.334               | 451.2944 | 469.3281           |
| Polyporusterone A                                                                                                                   | 3     | 3.1      | C28 H46 O6        | 45.359               | 478.3282 | 479.3357           |
| 11α-ethynyl-1α,25-dihydroxyvitamin D3 / 11α-ethynyl-1α,25-dihydroxycholecalciferol                                                  | -     | -        | C29 H44 O3        | 45.384               | 440.3279 | 441.3355           |
| (2xi,3xi)-2,3-Dihydroxy-12,18-ursadien-28-oic acid diacetate                                                                        | 2     | 2.6      | C34 H50 O6        | 45.484               | 554.3599 | 555.3671           |
| DG(22:5(7Z,10Z,13Z,16Z,19Z)/14:0/0:0)                                                                                               | 19    | 19.41    | C39 H66 O5        | 45.509               | 614.4919 | 637.4811           |
| Conicasterol B                                                                                                                      | -     | -        | C29 H44 O         | 45.572               | 408.341  | 409.3477           |
| Makisterone A                                                                                                                       | -     | -        | C28 H46 O7        | 45.585               | 494.3236 | 495.3306           |
| 22-Docosanolide                                                                                                                     | 1     | 1.1      | C22 H42 O2        | 45.71                | 338.3199 | 339.3271           |
| Polyporusterone C                                                                                                                   | 3     | 3.5      | C28 H44 O6        | 45.735               | 476.3136 | 477.321            |
| Erinacine P                                                                                                                         | 2     | 2.2      | C27 H40 O8        | 45.81                | 492.2737 | 515.2633           |
| 13-beta-D-Glucosyloxydocosanoate                                                                                                    | -     | -        | C28 H54 O8        | 45.835               | 518.3827 | 541.372            |
| Asparagoside A                                                                                                                      | 1     | 1.4      | C33 H54 O8        | 45.998               | 578.3808 | 579.3882           |
| Capsi-amide                                                                                                                         | 6     | 6.5      | C17 H35 N O       | 46.11                | 269.2729 | 270.2802           |
| N-stearoyl valine                                                                                                                   | 6     | 6.1      | C23 H45 N O3      | 46.186               | 383.3407 | 406.33             |
| Tigecycline                                                                                                                         | 13    | -        | C29 H39 N5 O8     | 46.236               | 585.2816 | 603.3155           |
| Spongipregnoside B                                                                                                                  | -     | -        | C33 H52 O11       | 46.436               | 624.3533 | 647.3428           |
| Cyclopassifloic acid C                                                                                                              | 19    | 19.3     | C31 H52 O7        | 46.837               | 536.3706 | 537.3779           |
| 2-Deoxybrassinolide                                                                                                                 | 3     | 3.3      | C28 H48 O5        | 46.862               | 464.3493 | 465.3567           |
| 3alpha,7alpha,12alpha,24-tetrahydroxy-24-methyl-5beta-cholestan-26-oic acid                                                         | -     | -        | C28 H48 O6        | 46.887               | 480.3446 | 481.3521           |
| 3alpha,7alpha,12alpha-Trihydroxy-5beta-23E-cholestan-26-oic acid                                                                    | 1     | 1.6      | C26 H42 O5        | 47.012               | 434.3023 | 435.3094           |
| Polyporusterone F                                                                                                                   | 3     | 3.1      | C28 H46 O5        | 47.138               | 462.3343 | 463.3416           |
| 3beta,15alpha-Diacetoxylanosta-8,24-dien-26-oic acid                                                                                | 2     | 2.6      | C34 H52 O6        | 47.238               | 556.3753 | 557.3826           |
| Stearamide                                                                                                                          | 19    | 19.42    | C18 H37 N O       | 47.351               | 283.2887 | 284.296            |
| 27-Nor-5b-cholestane-3a,7a,12a,24,25-pentol                                                                                         | 3     | 3.1      | C26 H46 O5        | 47.514               | 438.3346 | 461.3235           |
| Momordol                                                                                                                            | 1     | 1.7      | C26 H48 O5        | 47.739               | 440.3513 | 458.3838           |
| Vitamin D3 glucosiduronate                                                                                                          | 3     | 3.6      | C33 H52 O7        | 47.814               | 560.3693 | 561.3765           |
| 2-Amino-4-oxo-6-(1',2',3'-trihydroxypropyl)-diquinoid-7,8-dihydroxypterin                                                           | 25    | 25.1     | C9 H15 N5 O6      | 48.015               | 289.1017 | 336.327            |
|                                                                                                                                     |       |          |                   |                      |          |                    |
| Compound                                                                                                                            | Class | Subclass | Molecular Formula | Retention Time (min) | Mass     | Product Ions (m/z) |
| (17Z)-1α,25-dihydroxy-26,27-dimethyl-17,20,22,22,23,23-hexadehydro-24a,24b-dihomovitamin D3 / (17Z)-1α,25-dihydroxy-26,27-dimethyl- | -     | -        | C31 H46 O3        | 48.416               | 466.3464 | 465.356            |

|                                                             |   |     |             |        |          |          |
|-------------------------------------------------------------|---|-----|-------------|--------|----------|----------|
| 17,20,22,22,23,23-hexadehydro-24a,24b-dihomocholecalciferol |   |     |             |        |          |          |
| Theasapogenol A                                             | 2 | 2.6 | C30 H50 O6  | 48.554 | 506.3599 | 507.3673 |
| 6-Deoxodolichosterone                                       | 3 | 3.1 | C28 H48 O4  | 48.691 | 448.3545 | 449.3618 |
| Ascariadole epoxide                                         | - | -   | C10 H16 O3  | 48.741 | 184.1106 | 185.1179 |
| Hexacosanedioic acid                                        | - | -   | C26 H50 O4  | 48.829 | 426.3718 | 427.3792 |
| 12 $\beta$ -Hydroxy-3-oxo-5 $\beta$ -cholan-24-oic Acid     | 3 | 3.1 | C24 H38 O4  | 48.879 | 390.278  | 413.2673 |
| 3 $\alpha$ ,5 $\beta$ -Dihydroxycholan-24-oic Acid          | 3 | 3.1 | C24 H40 O4  | 49.142 | 392.2924 | 393.2994 |
| Docosanamide                                                | 1 | 1.1 | C22 H45 N O | 49.694 | 339.3512 | 340.3587 |
| 13E-Docosenamide                                            | 1 | 1.1 | C22 H43 N O | 49.944 | 337.3361 | 338.3433 |

**Table S2B.** Hexane partition [negative mode]

| Compound | Class | Subclass | Molecular Formula | Retention Time (min) | Mass     | Product Ions (m/z) |
|----------|-------|----------|-------------------|----------------------|----------|--------------------|
| Sucrose  | 8     | 8.3      | C12 H22 O11       | 2.383                | 342.1161 | 341.1089           |

| Pyroglutamic acid                                                               | 6     | 6.1      | C5 H7 N O3        | 3.134                | 129.0426 | 128.0353           |
|---------------------------------------------------------------------------------|-------|----------|-------------------|----------------------|----------|--------------------|
| (S)-Mevalonic acid                                                              | 1     | 1.4      | C6 H12 O4         | 3.185                | 148.0734 | 147.0661           |
| 6-hydroxy-2-hexynoic acid                                                       | -     | -        | C6 H8 O3          | 12.868               | 128.0474 | 127.0399           |
| C24 H50 O10                                                                     | 19    | 19.20    | C24 H50 O10       | 14.71                | 498.3408 | 497.3336           |
| 2-Hydroxydecanedioic acid                                                       | 1     | 1.4      | C10 H18 O5        | 15.612               | 218.115  | 217.108            |
| Methyl N-(a-methylbutyryl)glycine                                               | 1     | 1.4      | C9 H16 O4         | 17.266               | 188.1049 | 187.0977           |
| 2,3-dinor Thromboxane B1                                                        | -     | -        | C18 H32 O6        | 17.479               | 344.2195 | 343.2123           |
| Tuberonic acid                                                                  | 19    | 19.23    | C12 H18 O4        | 17.617               | 226.1205 | 225.1133           |
| Polyethylene, oxidized                                                          | 4     | -        | C12 H20 O5        | 17.654               | 244.1311 | 243.1238           |
| 2,3-dinor Thromboxane B1                                                        | 1     | 1.5      | C18 H32 O6        | 17.716               | 344.2197 | 343.2124           |
| Leu His Asn                                                                     | 1     | 1.4      | C16 H26 N6 O5     | 18.343               | 382.1959 | 427.1941           |
| Tetranor-PGF1alpha                                                              | 19    | -        | C16 H28 O5        | 18.418               | 300.1932 | 359.207            |
| Traumatic Acid                                                                  | 31    | 31.1     | C12 H20 O4        | 18.606               | 228.1359 | 227.1286           |
| 2R-hydroxy-10-undecenoic acid                                                   | 19    | 19.20    | C11 H20 O3        | 19.27                | 200.1408 | 199.1335           |
| 2,3-dinor, 6-keto-PGF1α                                                         | 1     | 1.5      | C18 H30 O6        | 19.283               | 342.2038 | 341.1965           |
| Benzenemethanol, 2-(2-hydroxypropoxy)-3-methyl-CAY10574                         | -     | -        | C9 H10 N6 O       | 19.671               | 218.0916 | 263.0897           |
| 6-Epi-7-isocucurbitic acid glucoside                                            | 1     | 1.5      | C18 H30 O8        | 19.721               | 374.1937 | 373.1861           |
| 2,3-Dinor-11b-PGF2a                                                             | -     | -        | C18 H30 O5        | 20.322               | 326.2087 | 325.2015           |
| 1-Cyclohexene-1-acrylic acid, 2,6,6-trimethyl-3-oxo-epi-4'-hydroxyjasmonic acid | 1     | 1.2      | C12 H16 O3        | 20.548               | 208.1096 | 207.1024           |
| 12-hydroxyjasmonic acid                                                         | 1     | 1.2      | C12 H18 O4        | 20.598               | 226.1203 | 225.1131           |
| Cibacic acid                                                                    | 1     | 1.2      | C12 H18 O4        | 20.874               | 226.1204 | 225.1132           |
| Lactapiperanol D                                                                | 2     | 2.1      | C18 H28 O5        | 20.974               | 324.1931 | 323.1858           |
| 9,12,13-trihydroxy-10,15-octadecadienoic acid                                   | 2     | 2.2      | C18 H28 O5        | 21.45                | 324.1934 | 323.1861           |
| Tetranor-PGD1                                                                   | 1     | 1.4      | C18 H32 O5        | 21.625               | 328.2245 | 327.2171           |
| 2,2,4,4-Tetramethyl-6-(1-oxobutyl)-1,3,5-cyclohexanetrione                      | 1     | 1.5      | C16 H26 O5        | 21.926               | 298.1777 | 357.1914           |
| 2,3-Dinor-TXB2                                                                  | 2     | 2.1      | C14 H20 O4        | 22.477               | 252.1358 | 251.1285           |
| 11,12,13-trihydroxy-9-octadecenoic acid                                         | 1     | 1.5      | C18 H30 O6        | 22.527               | 342.2039 | 341.1966           |
| O-Geranylvanillin                                                               | 1     | 1.4      | C18 H34 O5        | 22.64                | 330.2404 | 329.2331           |
| Tetranor Iloprost                                                               | 2     | 2.1      | C18 H24 O3        | 22.878               | 288.1721 | 287.1649           |
| estra-1,3,5(10)-triene-3,16beta,17beta-triol                                    | 1     | 1.5      | C18 H26 O4        | 22.928               | 306.1827 | 305.1755           |
| 4'-Hydroxyfenoprofen                                                            | 3     | 3.9      | C18 H24 O3        | 23.229               | 288.1725 | 287.1652           |
| Furfural diethyl acetal                                                         | 20    | 20.4     | C15 H14 O4        | 23.529               | 258.0888 | 257.0814           |
| (R)-8-Acetoxycarvotanacetone                                                    | 8     | 8.1      | C9 H14 O3         | 23.955               | 170.0942 | 169.0869           |
| 9-hydroperoxy-12,13-dihydroxy-10-octadecenoic acid                              | 2     | 2.1      | C12 H18 O3        | 24.031               | 210.1252 | 209.118            |
| Hemigossypol                                                                    | 1     | 1.4      | C18 H34 O6        | 24.181               | 346.2351 | 345.2278           |
| 5-Hydroxy-1-(4-hydroxyphenyl)-3-decanone                                        | -     | -        | C15 H16 O4        | 24.481               | 260.1043 | 259.097            |
| 16b-Hydroxyestradiol                                                            | -     | -        | C16 H24 O3        | 26.686               | 264.1721 | 263.1648           |
| 9-hydroperoxy-10E,12,15Z-octadecatrienoic acid                                  | 19    | 19.11    | C18 H24 O3        | 27.037               | 288.1726 | 287.1652           |
| Latanoprost Lactol                                                              | 1     | 1.4      | C18 H30 O4        | 27.351               | 310.2137 | 309.2065           |
| Embelin                                                                         | 1     | 1.5      | C18 H26 O4        | 27.388               | 306.1832 | 305.1756           |
| 5-O-Methylembelin                                                               | 8     | 8.2      | C17 H26 O4        | 27.501               | 294.1829 | 293.1757           |
| (±)9-HpODE                                                                      | 8     | 8.2      | C18 H28 O4        | 28.44                | 308.1982 | 307.1908           |
|                                                                                 | 1     | 1.2      | C18 H32 O4        | 28.641               | 312.2296 | 311.2222           |
| Compound                                                                        | Class | Subclass | Molecular Formula | Retention Time (min) | Mass     | Product Ions (m/z) |
| His Lys Pro                                                                     | 4     | -        | C17 H28 N6 O4     | 30.57                | 380.2171 | 379.2096           |
| (3R)-3-isopropenyl-6-oxoheptanoic acid                                          | -     | -        | C10 H16 O3        | 31.209               | 184.1101 | 183.1026           |
| Undecanedioic acid                                                              | 1     | 1.4      | C11 H20 O4        | 31.309               | 216.136  | 215.1287           |

|                                                                                                                                                                                        |              |                 |                          |                             |             |                           |
|----------------------------------------------------------------------------------------------------------------------------------------------------------------------------------------|--------------|-----------------|--------------------------|-----------------------------|-------------|---------------------------|
| 13(S)-HpOTrE                                                                                                                                                                           | 1            | 1.2             | C18 H30 O4               | 31.46                       | 310.2139    | 309.2067                  |
| 5-Hexyltetrahydro-2-oxo-3-furancarboxylic acid                                                                                                                                         | 31           | 31.1            | C11 H18 O4               | 32.049                      | 214.1204    | 213.113                   |
| 2,3-dihydroxy stearic acid                                                                                                                                                             | 1            | 1.4             | C18 H36 O4               | 32.149                      | 316.2608    | 315.2535                  |
| (±)12,13-DiHOME                                                                                                                                                                        | 1            | 1.4             | C18 H34 O4               | 32.299                      | 314.245     | 313.2377                  |
| Notoginsenoside R10                                                                                                                                                                    | 3            | 3.11            | C30 H50 O9               | 32.863                      | 554.3443    | 553.3371                  |
| (23S,25R)-1 $\alpha$ ,25-dihydroxyvitamin D3<br>26,23-lactol / (23S,25R)-1 $\alpha$ ,25-dihydroxycholecalciferol 26,23-lactol                                                          | -            | -               | C27 H42 O5               | 32.9                        | 446.3023    | 445.295                   |
| 10-epi-gamma-Eudesmol                                                                                                                                                                  | 2            | 2.5             | C15 H26 O                | 33.076                      | 222.1982    | 267.1963                  |
| alpha-licanic acid                                                                                                                                                                     | -            | -               | C18 H28 O3               | 33.151                      | 292.2039    | 291.1965                  |
| Methoprene acid                                                                                                                                                                        | -            | -               | C16 H28 O3               | 33.401                      | 268.2035    | 267.1961                  |
| Lawsone                                                                                                                                                                                | 29           | 29.2            | C10 H6 O3                | 33.601                      | 174.0315    | 173.0243                  |
| Lophirone D                                                                                                                                                                            | 32           | 32.3            | C24 H16 O6               | 33.602                      | 400.094     | 459.1079                  |
| (22S)-1 $\alpha$ ,22,25-trihydroxy-23,24-tetradecahydro-24a-homo-20-epivitamin D3 / (22S)-1 $\alpha$ ,22,25-trihydroxy-23,24-tetradecahydro-24a-homo-20-epicholecalciferol             | -            | -               | C28 H42 O4               | 33.702                      | 442.308     | 487.306                   |
| 13(S)-HODE                                                                                                                                                                             | 1            | 1.2             | C18 H32 O3               | 34.404                      | 296.2354    | 295.2281                  |
| Palmitoyl-EA                                                                                                                                                                           | 19           | 19.42           | C18 H37 N O2             | 34.441                      | 299.2818    | 344.2799                  |
| Ambrettolic acid                                                                                                                                                                       | -            | -               | C16 H30 O3               | 34.667                      | 270.2191    | 269.2119                  |
| Porrigenin A                                                                                                                                                                           | 2            | 2.6             | C27 H44 O5               | 34.704                      | 448.3179    | 447.3107                  |
| 3,5-Dimethoxy-8,8-dimethyl-2-phenyl-4H,8H-benzo[1,2-b:3,4-b']dipyrans-4-one                                                                                                            | -            | -               | C22 H20 O5               | 35.142                      | 364.1308    | 363.1236                  |
| 9-OxoODE                                                                                                                                                                               | 1            | 1.2             | C18 H30 O3               | 35.256                      | 294.2196    | 293.2123                  |
| 18-acetoxy-1 $\alpha$ ,25-dihydroxyvitamin D3 / 18-acetoxy-1 $\alpha$ ,25-dihydroxycholecalciferol                                                                                     | -            | -               | C29 H46 O5               | 35.28                       | 474.3339    | 473.3266                  |
| cis-9,10-Epoxystearic acid                                                                                                                                                             | 1            | 1.2             | C18 H34 O3               | 35.97                       | 298.2506    | 297.2434                  |
| Homodolicholide                                                                                                                                                                        | 9            | 9.1             | C29 H48 O6               | 36.107                      | 492.3445    | 491.3373                  |
| 10S-HODE                                                                                                                                                                               | 1            | 1.2             | C18 H32 O3               | 36.32                       | 296.2349    | 295.2277                  |
| 13(S)-HOTrE                                                                                                                                                                            | 1            | 1.2             | C18 H30 O3               | 36.483                      | 294.2193    | 293.2121                  |
| (22R)-1 $\alpha$ ,22,25-trihydroxy-23,24-tetradecahydro-24a,24b-dihomo-20-epivitamin D3 / (22R)-1 $\alpha$ ,22,25-trihydroxy-23,24-tetradecahydro-24a,24b-dihomo-20-epicholecalciferol | -            | -               | C29 H44 O4               | 36.608                      | 456.3231    | 455.3158                  |
| Octadecanedioic acid                                                                                                                                                                   | 1            | 1.4             | C18 H34 O4               | 36.684                      | 314.2452    | 313.2379                  |
| Val His Lys                                                                                                                                                                            | 4            | -               | C17 H30 N6 O4            | 36.909                      | 382.2326    | 381.2254                  |
| (22S)-1 $\alpha$ ,22,25-trihydroxy-26,27-dimethyl-23,23,24,24-tetradecahydrovitamin D3 / (22S)-1 $\alpha$ ,22,25-trihydroxy-26,27-dimethyl-23,23,24,24-tetradecahydrocholecalciferol   | -            | -               | C29 H44 O4               | 37.285                      | 456.3235    | 455.316                   |
| Gemfibrozil                                                                                                                                                                            | 11           | -               | C15 H22 O3               | 37.961                      | 250.1567    | 249.1496                  |
| Normammein                                                                                                                                                                             | 24           | 24.1            | C21 H26 O5               | 38.162                      | 358.1776    | 357.1704                  |
| Palmitoyl glucuronide                                                                                                                                                                  | 1            | 1.8             | C22 H42 O7               | 38.187                      | 418.2924    | 463.2908                  |
| 9(S)-HODE                                                                                                                                                                              | 1            | 1.2             | C18 H32 O3               | 38.237                      | 296.2347    | 295.2275                  |
| 1 $\alpha$ -hydroxy-2 $\beta$ -(2-hydroxyethoxy)vitamin D3 / 1 $\alpha$ -hydroxy-2 $\beta$ -(2-hydroxyethoxy)cholecalciferol                                                           | -            | -               | C29 H48 O4               | 38.713                      | 460.3543    | 459.3472                  |
| Tephrowatsin B                                                                                                                                                                         | -            | -               | C22 H24 O3               | 39.264                      | 336.1718    | 381.1701                  |
| <b>Compound</b>                                                                                                                                                                        | <b>Class</b> | <b>Subclass</b> | <b>Molecular Formula</b> | <b>Retention Time (min)</b> | <b>Mass</b> | <b>Product Ions (m/z)</b> |
| 10-keto palmitic acid                                                                                                                                                                  | 1            | 1.4             | C16 H30 O3               | 39.728                      | 270.2193    | 269.2121                  |
| 2-Hydroxyhexadecanoic acid                                                                                                                                                             | 1            | 1.4             | C16 H32 O3               | 39.828                      | 272.2347    | 271.2275                  |
| Armillarivin                                                                                                                                                                           | 2            | 2.5             | C23 H28 O5               | 39.866                      | 384.193     | 383.1857                  |



|                                                                                                                                                          |    |      |              |        |          |          |
|----------------------------------------------------------------------------------------------------------------------------------------------------------|----|------|--------------|--------|----------|----------|
| 3-Ethyltridecan-2-one                                                                                                                                    | -  | -    | C15 H30 O    | 40.066 | 226.2294 | 225.2222 |
| Methylprednisone                                                                                                                                         | 2  | 2.2  | C22 H28 O5   | 40.166 | 372.1929 | 371.1856 |
| (24R)-1 $\alpha$ ,24,25,26-tetrahydroxyvitamin D2 / (24R)-1 $\alpha$ ,24,25,26-tetrahydroxyergocalciferol                                                | -  | -    | C28 H44 O5   | 40.354 | 460.3182 | 459.311  |
| N-palmitoyl GABA                                                                                                                                         | 6  | 6.6  | C20 H39 N O3 | 40.893 | 341.2925 | 340.2853 |
| Hecogenin Acetate                                                                                                                                        | 17 | 17.2 | C29 H44 O5   | 41.093 | 472.3185 | 471.3107 |
| 26,27-diethyl-1 $\alpha$ ,25-dihydroxy-22-thia-20-epivitamin D3 / 26,27-diethyl-1 $\alpha$ ,25-dihydroxy-22-thia-20-epicholecalciferol                   | -  | -    | C30 H50 O3 S | 41.193 | 490.3501 | 535.3482 |
| Lisuride                                                                                                                                                 | 14 | 14.2 | C20 H26 N4 O | 41.318 | 338.2118 | 397.2259 |
| 16-hydroxy hexadecanoic acid                                                                                                                             | 1  | 1.4  | C16 H32 O3   | 41.507 | 272.2347 | 271.2274 |
| Pristanal                                                                                                                                                | 2  | 2.2  | C19 H38 O    | 41.895 | 282.2923 | 327.2906 |
| Euglobal Ilc                                                                                                                                             | 9  | 9.1  | C23 H30 O5   | 42.033 | 386.2088 | 385.2016 |
| 2-hydroxy behenic                                                                                                                                        | 1  | 1.4  | C22 H44 O3   | 42.609 | 356.3283 | 355.3211 |
| Squamosinin A                                                                                                                                            | 1  | 1.7  | C36 H62 O8   | 43.323 | 622.4429 | 621.4355 |
| Docosanedioic acid                                                                                                                                       | 1  | 1.4  | C22 H42 O4   | 43.711 | 370.3085 | 369.3013 |
| 21-Hydroxy-heneicosanoic acid                                                                                                                            | 1  | 1.4  | C21 H42 O3   | 43.924 | 342.3127 | 341.3055 |
| Ricinoleic Acid methyl ester                                                                                                                             | 1  | 1.4  | C19 H36 O3   | 44.664 | 312.2657 | 311.2584 |
| Dihydro-7-Desacetyldeoxygedunin                                                                                                                          | -  | -    | C26 H34 O5   | 44.964 | 426.2399 | 425.2327 |
| 28-Homobrassinolide                                                                                                                                      | 3  | 3.3  | C29 H50 O6   | 45.027 | 494.3596 | 493.3524 |
| DL-2-hydroxy stearic acid                                                                                                                                | 1  | 1.4  | C18 H36 O3   | 45.553 | 300.2661 | 299.2588 |
| 1 $\alpha$ ,25-dihydroxy-26,27-dimethyl-20,21-didehydro-23-oxavitamin D3 / 1 $\alpha$ ,25-dihydroxy-26,27-dimethyl-20,21-didehydro-23-oxacholecalciferol | -  | -    | C28 H46 O4   | 45.628 | 446.3392 | 445.3319 |
| S-Japonin                                                                                                                                                | 2  | 2.5  | C19 H28 O3 S | 46.28  | 336.1751 | 381.1735 |
| 1 $\alpha$ ,25-dihydroxy-2 $\alpha$ -(3-hydroxypropoxy)-19-norvitamin D3 / 1 $\alpha$ ,25-dihydroxy-2 $\alpha$ -(3-hydroxypropoxy)-19-norcholecalciferol | -  | -    | C29 H50 O5   | 47.132 | 478.3648 | 477.3575 |
| Chlorogenin                                                                                                                                              | 2  | 2.6  | C28 H48 O4   | 48.71  | 448.3543 | 447.3472 |
| 2-hydroxyphytanic acid                                                                                                                                   | 2  | 2.2  | C20 H40 O3   | 49.261 | 328.2972 | 327.29   |

**Table S2C.** EtOAc partition [positive mode]

| Compound                                                        | Class | Subclass | Molecular Formula | Retention Time (min) | Mass     | Product Ions (m/z) |
|-----------------------------------------------------------------|-------|----------|-------------------|----------------------|----------|--------------------|
| Choline                                                         | 5     | 5.2      | C5H14NO           | 1.941                | 104.1079 | 104.1074           |
| $\alpha$ -D-Glucose                                             | 8     | 8.3      | C6 H12 O6         | 2.066                | 180.0635 | 203.0527           |
| alpha,beta-Trehalose                                            | 8     | 8.3      | C12 H22 O11       | 2.693                | 342.1174 | 365.1068           |
| Niacinamide                                                     | 19    | 19.14    | C6 H6 N2 O        | 4.221                | 122.0482 | 123.0554           |
| 2,3-Butanediol glucoside                                        | 8     | 8.3      | C10 H20 O7        | 4.647                | 252.1216 | 275.1108           |
| Anhalonidine                                                    | -     | -        | C12 H17 N O3      | 7.328                | 223.1212 | 224.1286           |
| Butamben                                                        | 20    | 20.1     | C11 H15 N O2      | 7.704                | 193.1107 | 194.118            |
| 2,3-Butanediol glucoside                                        | 14    | 14.6     | C10 H20 O7        | 7.729                | 252.1212 | 275.1105           |
| Ethyl (S)-3-hydroxybutyrate glucoside                           | 1     | 1.8      | C12 H22 O8        | 10.41                | 294.1318 | 317.121            |
| PE(18:4(6Z,9Z,12Z,15Z)/0:0)                                     | -     | -        | C23 H40 N O7 P    | 13.254               | 473.2561 | 496.2445           |
| diethyl 2,6-dimethyl-4-oxo-4h-pyran-3,5-dicarboxylate           | -     | -        | C13 H16 O6        | 13.466               | 268.0952 | 291.0844           |
| Octanoylglucuronide                                             | 8     | 8.3      | C14 H24 O8        | 13.768               | 320.1479 | 343.1371           |
| Trp-P-1                                                         | 23    | 23.4     | C13 H13 N3        | 13.93                | 211.1117 | 212.119            |
| Glucocaffeic acid                                               | 8     | 8.3      | C15 H18 O9        | 13.968               | 342.0955 | 365.0846           |
| 1,4-Naphthoquinone                                              | 29    | 29.2     | C10 H6 O2         | 14.043               | 158.0371 | 159.0443           |
| 3-Hydroxy-4-butanolide                                          | 8     | 8.3      | C10 H16 O8        | 14.281               | 264.0852 | 287.0744           |
| N1-Caffeoyl-N10-feruloylspermidine                              | 12    | 12.2     | C26 H33 N3 O6     | 14.444               | 483.237  | 484.2443           |
| N1,N10-Diferuloylspermidine                                     | 12    | 12.2     | C27 H35 N3 O6     | 14.82                | 497.2541 | 498.2614           |
| alpha-Peroxyachifolide                                          | 2     | 2.3      | C20 H24 O7        | 15.646               | 376.153  | 399.1423           |
| 1,5-Dibutyl methyl hydroxycitrate                               | 6     | 6.4      | C15 H26 O8        | 15.847               | 334.1634 | 357.1526           |
| Pentyl heptanoate                                               | 1     | 1.9      | C12 H24 O2        | 17.074               | 200.178  | 218.2119           |
| 2,3-dinor Thromboxane B1                                        | -     | -        | C18 H32 O6        | 17.651               | 344.2202 | 367.2094           |
| methyl 9,11-epidioxy-12,15-dihydroperoxy-5,7,13-eicosatrienoate | -     | -        | C21 H34 O8        | 17.776               | 414.2257 | 437.215            |
| Tetranor-PGF1alpha                                              | -     | -        | C16 H28 O5        | 18.227               | 300.194  | 323.1833           |
| Pterostilbene Glycinate                                         | 7     | -        | C18 H19 N O4      | 18.377               | 313.132  | 336.1212           |
| Norcapillene                                                    | -     | -        | C11 H8            | 18.578               | 140.063  | 141.0703           |
| Citrusinine I                                                   | 14    | 14.4     | C16 H15 N O5      | 18.653               | 301.0956 | 324.0849           |
| Gln Ala Trp                                                     | 4     | -        | C19 H25 N5 O5     | 18.929               | 403.1862 | 421.2196           |
| Acetylcaranine                                                  | 6     | 6.1      | C18 H19 N O4      | 19.029               | 313.1323 | 336.1215           |
| 10-hydroxy-hexadecan-1,16-dioic acid                            | -     | -        | C16 H30 O5        | 19.38                | 302.2098 | 325.199            |
| formyl 7-oxo-11E-tetradecenoate                                 | -     | -        | C15 H26 O3        | 19.53                | 254.1888 | 277.1781           |
| Myxochelin B                                                    | -     | -        | C20 H25 N3 O6     | 19.718               | 403.1746 | 421.2087           |
| Armillane                                                       | 2     | 2.2      | C23 H32 O7        | 20.081               | 420.2134 | 421.2202           |
| Myristicanol B                                                  | -     | -        | C22 H28 O7        | 20.382               | 404.184  | 427.1732           |
| Samin                                                           | 19    | -        | C13 H14 O5        | 20.633               | 250.0848 | 273.0741           |
| Decyl isobutyrate                                               | -     | -        | C14 H28 O2        | 20.733               | 228.2097 | 246.2435           |
| (9R,10S,12Z)-9,10-Dihydroxy-8-oxo-12-octadecenoic acid          | 1     | 1.2      | C18 H32 O5        | 21.134               | 328.2259 | 351.2153           |
| Phe Arg Thr                                                     | 4     | -        | C19 H30 N6 O5     | 21.835               | 422.2287 | 423.2358           |
| 9S,10S,11R-trihydroxy-12Z-octadecenoic acid                     | 1     | 1.4      | C18 H34 O5        | 22.186               | 330.2418 | 353.2312           |
| 1-Hexadecylamine                                                | 5     | 5.1      | C16 H35 N         | 22.361               | 241.2772 | 242.2845           |
| Luvangetin                                                      | -     | -        | C15 H14 O4        | 22.8                 | 258.0898 | 281.079            |
| Dihydrocapsiate                                                 | 21    | 21.1     | C18 H28 O4        | 23.388               | 308.1992 | 331.1885           |
| C16 Sphinganine                                                 | 5     | 5.1      | C16 H35 N O2      | 24.015               | 273.2676 | 296.2568           |
| Palmitic amide                                                  | 1     | 1.1      | C16 H33 N O       | 24.04                | 255.2567 | 256.264            |
| Xestoaminol C                                                   | 5     | 5.1      | C14 H31 N O       | 24.253               | 229.2415 | 230.2488           |
| Phytosphingosine                                                | 5     | 5.1      | C18 H39 N O3      | 24.29                | 317.2938 | 318.3012           |
| 7-Ethyl-4-tridecen-6-one                                        | -     | -        | C15 H28 O         | 24.566               | 224.2148 | 242.2486           |
| 2-Aminohexadecanoic acid                                        | 1     | 1.9      | C16 H33 N O2      | 24.892               | 271.2519 | 272.2592           |
| Palmitoleamide                                                  | 1     | 1.1      | C16 H31 N O       | 24.929               | 253.2411 | 254.2483           |
| Limonen-6-ol-pivalate                                           | -     | -        | C15 H24 O2        | 25.042               | 236.1784 | 259.1676           |

| Compound                                                                 | Class | Subclass | Molecular Formula | Retention Time (min) | Mass     | Product Ions (m/z) |
|--------------------------------------------------------------------------|-------|----------|-------------------|----------------------|----------|--------------------|
| C17 Sphinganine                                                          | 5     | 5.1      | C17 H37 N O2      | 25.143               | 287.2828 | 288.2901           |
| Prosopinine                                                              | -     | -        | C16 H33 N O3      | 25.318               | 287.247  | 288.2541           |
| 19-noraldosterone                                                        | 3     | 3.2      | C20 H26 O5        | 25.493               | 346.1786 | 369.1679           |
| 17-hydroxy-heptadecanoic acid                                            | 1     | 1.4      | C17 H34 O3        | 26.195               | 286.2515 | 304.2853           |
| Gingerenone B                                                            | 19    | 19.3     | C22 H26 O6        | 26.746               | 386.1735 | 409.1628           |
| (R)-benzyl Mandelate                                                     | 20    | 20.9     | C15 H14 O3        | 27.798               | 242.0948 | 265.084            |
| Calamendiol                                                              | 2     | 2.5      | C15 H26 O2        | 28.6                 | 238.1938 | 261.1828           |
| 15-methyl-15(S)-PGE1                                                     | -     | -        | C21 H36 O5        | 28.914               | 368.2567 | 391.246            |
| N-Methyldioctylamine                                                     | 5     | 5.1      | C17 H37 N         | 29.402               | 255.2934 | 256.3007           |
| 2,2-Dimethyl-3,4-bis(4-methoxyphenyl)-2H-1-benzopyran-7-ol acetate       | -     | -        | C27 H26 O5        | 29.477               | 430.1785 | 453.168            |
| Clausarinol                                                              | 24    | 24.2     | C24 H30 O6        | 29.515               | 414.2052 | 437.1945           |
| 15-methyl-15S-PGE2                                                       | -     | -        | C21 H34 O5        | 30.317               | 366.2413 | 389.2303           |
| Alfuzosin                                                                | 18    | 18.1     | C19 H27 N5 O4     | 30.404               | 389.2069 | 407.2407           |
| Cincassiol B                                                             | 2     | 2.2      | C20 H32 O8        | 30.479               | 400.2106 | 423.1998           |
| 8-HpODE                                                                  | 1     | 1.2      | C18 H32 O4        | 30.58                | 312.2309 | 335.22             |
| 1-Naphthylacetylspermine                                                 | 6     | 6.5      | C22 H34 N4 O      | 31.031               | 370.2721 | 393.2614           |
| Leu Ala Arg                                                              | 4     | -        | C15 H30 N6 O4     | 31.219               | 358.2337 | 359.2409           |
| Stearidonic Acid                                                         | 1     | 1.2      | C18 H28 O2        | 32.008               | 276.2096 | 277.2168           |
| Kolanone                                                                 | -     | -        | C33 H42 O4        | 32.045               | 502.3059 | 520.3399           |
| 13,16-Octadecadiynoic acid                                               | 1     | 1.4      | C18 H28 O2        | 32.408               | 276.2097 | 277.2169           |
| LysoPE(0:0/16:0)                                                         | 27    | 27.1     | C21 H44 N O7 P    | 32.509               | 453.2865 | 454.2939           |
| Glu His Glu                                                              | 4     | -        | C16 H23 N5 O8     | 32.559               | 413.154  | 431.1877           |
| 9-Nonadecene                                                             | 19    | 19.36    | C19 H38           | 32.76                | 266.2984 | 284.3322           |
| Gentamicin                                                               | 8     | 8.3      | C21 H43 N5 O7     | 33.01                | 477.3149 | 478.3223           |
| [7]-Paradol                                                              | 21    | 21.1     | C18 H28 O3        | 33.236               | 292.2044 | 315.1935           |
| 18:1(5Z)(9Me,13Me,17Me)                                                  | -     | -        | C21 H40 O2        | 33.636               | 324.3033 | 342.3372           |
| (Z)-2-Tetracos-15-enamidoethanesulfonic acid                             | -     | -        | C26 H51 N O4 S    | 33.887               | 473.3523 | 496.3416           |
| PE(19:0/0:0)                                                             | -     | -        | C24 H50 N O7 P    | 34                   | 495.3338 | 518.3231           |
| 1-Palmitoyllysophosphatidylcholine                                       | 27    | 27.2     | C24H51NO7P        | 34.125               | 496.3411 | 496.3405           |
| Acetylenic acids; 17-Octadecen-9-ynoic acid                              | -     | -        | C18 H30 O2        | 34.238               | 278.2251 | 279.2324           |
| 9-Docosene                                                               | 19    | 19.7     | C22 H44           | 34.363               | 308.3455 | 326.3794           |
| Citribuntin                                                              | 24    | -        | C15 H14 O3        | 34.914               | 242.0946 | 243.1018           |
| Polysorbate 60                                                           | 1     | 1.9      | C22 H42 O8        | 34.965               | 434.2885 | 457.2778           |
| 1-Naphthylacetylspermine                                                 | 1     | 1.2      | C22 H34 N4 O      | 35.114               | 370.2719 | 393.2611           |
| 13-OxoODE                                                                | -     | -        | C18 H30 O3        | 35.39                | 294.22   | 317.2093           |
| 1a,1b-dihomo-PGE1                                                        | 6     | 6.3      | C22 H38 O5        | 35.415               | 382.2725 | 405.2616           |
| Dilauryl 3,3'-thiodipropionate                                           | 3     | 3.12     | C30 H58 O4 S2     | 35.515               | 546.3752 | 547.3822           |
| Ginsenoside I                                                            | 3     | 3.12     | C48 H82 O20       | 35.716               | 978.5404 | 507.3039           |
| PI(O-20:0/22:6 (4Z,7Z,10Z,13Z,16Z,19Z))                                  | -     | -        | C51 H89 O12 P     | 35.891               | 924.6068 | 485.2926           |
| Citronellyl cinnamate                                                    | 1     | 1.3      | C19 H26 O2        | 36.016               | 286.1938 | 309.1832           |
| PtdIns-(5)-P1 (1,2-dipalmitoyl)                                          | -     | -        | C41 H80 O16 P2    | 36.029               | 890.489  | 463.2784           |
| Diospolysaponin A                                                        | -     | -        | C40 H66 O16       | 36.418               | 802.4366 | 419.2521           |
| Pseudoginsenoside RT3                                                    | 2     | 2.6      | C41 H70 O13       | 36.631               | 770.4793 | 771.4867           |
| Dihydroartemisinin                                                       | 2     | 2.5      | C15 H24 O5        | 36.918               | 284.1625 | 285.1705           |
| Cyclopassifloside II                                                     | 2     | 2.4      | C37 H62 O11       | 37.082               | 682.4276 | 683.4351           |
| Diisobutyl phthalate                                                     | 20    | 20.1     | C16 H22 O4        | 37.257               | 278.1524 | 301.1416           |
| Nonoxynol-9                                                              | 8     | 8.1      | C33 H60 O10       | 37.27                | 616.4196 | 639.409            |
| (25S)-5alpha-cholestan-3beta,4beta,6alpha,8beta,15alpha,16beta,26-heptol | -     | -        | C27 H48 O7        | 37.796               | 484.341  | 507.3303           |
| Leu Trp Lys                                                              | 4     | -        | C23 H35 N5 O4     | 38.084               | 445.2704 | 463.3042           |

| Compound                                                                                         | Class | Subclass | Molecular Formula | Retention Time (min) | Mass     | Product Ions (m/z) |
|--------------------------------------------------------------------------------------------------|-------|----------|-------------------|----------------------|----------|--------------------|
| 10-F2-dihomo-IsoP                                                                                | -     | -        | C23 H40 O5        | 38.247               | 396.2882 | 419.2775           |
| Montanol                                                                                         | 1     | 1.4      | C21 H36 O4        | 38.385               | 352.2621 | 375.2514           |
| Annosquamosin B                                                                                  | 2     | 2.2      | C19 H32 O3        | 38.447               | 308.2357 | 331.225            |
| (3b,6b,8a,12a)-8,12-Epoxy-7(11)-<br>eremophilene-6,8,12-trimethoxy-3-ol                          | -     | -        | C18 H30 O5        | 38.522               | 326.2099 | 349.1992           |
| Polidocanol                                                                                      | 8     | 8.1      | C30 H62 O10       | 38.936               | 582.4344 | 605.4237           |
| 8beta-Angeloyloxy-15-hydroxy-<br>1alpha,10R-dimethoxy-3-oxo-11(13)-<br>germacren-12,6alpha-olide | 2     | 2.3      | C22 H32 O8        | 39.625               | 424.2094 | 447.1994           |
| Glyceryl lactooleate                                                                             | 1     | 1.9      | C24 H44 O6        | 39.825               | 428.3123 | 429.3197           |
| Val Val Trp                                                                                      | 4     | -        | C21 H30 N4 O4     | 39.938               | 402.2268 | 425.2161           |
| 17,20-dimethyl Prostaglandin F1 $\alpha$                                                         | 1     | 1.5      | C22 H40 O5        | 39.963               | 384.2863 | 385.2936           |
| Thromboxanoic acid skeleton                                                                      | -     | -        | C20 H36 O4        | 40.051               | 340.26   | 341.2673           |
| Anandamide (20:l, n-9)                                                                           | 5     | 5.1      | C22 H43 N O2      | 40.151               | 353.3302 | 376.3194           |
| Lys Lys Ser                                                                                      | 4     | -        | C15 H31 N5 O5     | 40.364               | 361.2308 | 379.2646           |
| N-(2-Methoxyphenyl)-N'-(2-<br>naphthyl)urea                                                      | -     | -        | C18 H16 N2 O2     | 40.401               | 292.1221 | 293.1291           |
| Aplidiasphingosine                                                                               | -     | -        | C22 H43 N O3      | 40.564               | 369.325  | 392.3141           |
| Erinacine G                                                                                      | 8     | 8.3      | C25 H36 O8        | 40.614               | 464.2422 | 487.2318           |
| Aplidiasphingosine                                                                               | 4     | -        | C22 H43 N O3      | 40.802               | 369.3251 | 392.3144           |
| Ile Phe Trp                                                                                      | -     | -        | C26 H32 N4 O4     | 40.827               | 464.2426 | 487.2321           |
| N-tert-Butyloxycarbonyl-deacetyl-<br>leupeptin                                                   | -     | -        | C23 H44 N6 O5     | 41.028               | 484.3363 | 265.1573           |
| PE(21:0/0:0)                                                                                     | -     | -        | C26 H54 N O7 P    | 41.328               | 523.3642 | 524.3715           |
| Desglucocheirotozol                                                                              | 3     | 3.3      | C29 H44 O10       | 41.328               | 552.2948 | 575.2845           |
| Anandamide (20:2, n-6)                                                                           | 5     | 5.1      | C22 H41 N O2      | 41.429               | 351.3147 | 374.304            |
| 1-Oleoyl-2-acetyl-sn-glycerol                                                                    | -     | -        | C23 H42 O5        | 41.905               | 398.3017 | 399.3091           |
| Lys Val Trp                                                                                      | 4     | -        | C22 H33 N5 O4     | 42.506               | 431.2545 | 449.2882           |
| 9-Pentacosene                                                                                    | 19    | 19.36    | C25 H50           | 42.531               | 350.3919 | 368.4258           |
| Falcarindiol                                                                                     | 1     | 1.7      | C17 H24 O2        | 42.669               | 260.1783 | 261.1856           |
| Terbucarb                                                                                        | -     | -        | C17 H27 N O2      | 42.932               | 277.2047 | 278.2117           |
| Purpureacin 2                                                                                    | 1     | 1.7      | C37 H66 O8        | 42.932               | 638.4758 | 661.4651           |
| Oleamide                                                                                         | 1     | 1.1      | C18 H35 N O       | 43.333               | 281.2725 | 282.2798           |
| Octadecyl fumarate                                                                               | 1     | 1.9      | C22 H40 O4        | 44.962               | 368.291  | 369.2984           |
| (13R,14R)-7-Labdene-13,14,15-triol                                                               | 2     | 2.2      | C20 H36 O3        | 45.037               | 324.2648 | 325.2722           |
| Met Arg Val                                                                                      | 4     | -        | C16 H32 N6 O4 S   | 45.112               | 404.2213 | 427.2104           |
| Polyporusterone A                                                                                | 3     | 3.1      | C28 H46 O6        | 45.438               | 478.3276 | 479.3349           |
| Glutathionylaminopropylcadaverine                                                                | -     | -        | C18 H36 N6 O5 S   | 45.613               | 448.2481 | 471.2372           |
| 22-Docosanolide                                                                                  | 1     | 1.1      | C22 H42 O2        | 45.638               | 338.3192 | 339.3265           |
| 13-beta-D-Glucosyloxydocosanoate                                                                 | -     | -        | C28 H54 O8        | 45.738               | 518.3825 | 541.3717           |
| N-stearoyl valine                                                                                | 6     | 6.1      | C23 H45 N O3      | 46.026               | 383.3407 | 406.3299           |
| 13E-Docosenamide                                                                                 | 1     | 1.1      | C22 H43 N O       | 46.139               | 337.3351 | 338.3424           |
| Spongipregnoside B                                                                               | -     | -        | C33 H52 O11       | 46.54                | 624.3522 | 647.3418           |
| Stearamide                                                                                       | 19    | 19.42    | C18 H37 N O       | 46.716               | 283.2885 | 284.2958           |
| Momordol                                                                                         | 1     | 1.7      | C26 H48 O5        | 47.041               | 440.3506 | 463.3397           |
| Piperidine                                                                                       | 1     | 1.1      | C22 H41 N O       | 47.718               | 335.3196 | 336.3268           |
| Polyporusterone F                                                                                | 3     | 3.1      | C28 H46 O5        | 48.131               | 462.3335 | 463.3403           |
| Theasapogenol A                                                                                  | 2     | 2.6      | C30 H50 O6        | 48.544               | 506.3587 | 507.3659           |
| TG(8:0/8:0/8:0)                                                                                  | 19    | 19.43    | C27 H50 O6        | 48.62                | 470.361  | 493.3504           |
| 12 $\beta$ -Hydroxy-3-oxo-5 $\beta$ -cholan-24-oic<br>Acid                                       | -     | -        | C24 H38 O4        | 48.758               | 390.2777 | 413.267            |
| Diocetyl hexanedioate                                                                            | 1     | 1.3      | C22 H42 O4        | 49.021               | 370.3089 | 393.298            |
| Eicosapentaenoyl Serotonin                                                                       | 23    | 23.5     | C30 H40 N2 O2     | 49.584               | 460.3095 | 461.317            |

**Table S2D.** EtOAc partition [negative mode]

| Compound                                    | Class | Subclass | Molecular Formula | Retention Time (min) | Mass     | Product Ions (m/z) |
|---------------------------------------------|-------|----------|-------------------|----------------------|----------|--------------------|
| Sucrose                                     | 8     | 8.3      | C12 H22 O11       | 2.72                 | 342.1161 | 387.1143           |
| Citbismine C                                | 14    | 14.4     | C37 H36 N2 O11    | 2.745                | 684.232  | 683.2249           |
| Pyroglutamic acid                           | 6     | 6.1      | C5 H7 N O3        | 4.399                | 129.0426 | 128.0353           |
| Succinic acid                               | 6     | 6.3      | C4 H6 O4          | 4.499                | 118.0264 | 117.0192           |
| Erythrityl Tetranitrate                     | 19    | 19.44    | C4 H6 N4 O12      | 4.549                | 301.9995 | 300.9919           |
| Adenine                                     | 26    | 26.1     | C5 H5 N5          | 4.6                  | 135.0543 | 134.047            |
| Pyrocatechol                                | 21    | 21.6     | C6 H6 O2          | 10.562               | 110.0366 | 109.0294           |
| Fenpyroximate                               | 8     | 8.1      | C24 H27 N3 O4     | 11.227               | 421.1999 | 480.2137           |
| Cadabicine                                  | 8     | 8.1      | C25 H29 N3 O4     | 11.765               | 435.2156 | 480.2138           |
| 3,4-Dihydroxybenzaldehyde                   | 8     | 8.2      | C7 H6 O3          | 12.116               | 138.0316 | 137.0242           |
| Esculetin                                   | 24    | 24.1     | C9 H6 O4          | 13.081               | 178.0266 | 177.0193           |
| Benexate                                    | -     | -        | C23 H27 N3 O4     | 13.119               | 409.2002 | 468.214            |
| 4-Aminocatechol                             | -     | -        | C6 H7 N O2        | 13.268               | 125.0476 | 124.0403           |
| o-Vinylanisole                              | 11    | 11.1     | C9 H10 O          | 13.883               | 134.0735 | 133.0662           |
| 2-Deoxy-D-glucose 6-phosphate               | -     | -        | C6 H13 O8 P       | 13.92                | 244.0347 | 243.0275           |
| Lunarine                                    | -     | -        | C25 H31 N3 O4     | 13.92                | 437.2322 | 482.2306           |
| N1,N10-Dicoumaroylspermidine                | 12    | 12.2     | C25 H31 N3 O4     | 14.221               | 437.2323 | 482.2307           |
| Citrusin B                                  | 19    | -        | C27 H36 O13       | 14.847               | 568.2161 | 567.209            |
| Methylpicraquassioside A                    | 8     | 8.3      | C19 H24 O10       | 15.424               | 412.1368 | 411.1296           |
| Dihydrojasmonic Acid, Methyl Ester          | 1     | 1.2      | C13 H22 O3        | 15.624               | 226.1572 | 271.1554           |
| Cassitoroside                               | 8     | 8.3      | C25 H32 O14       | 16.15                | 556.1792 | 555.1721           |
| L-Citronellol glucoside                     | 2     | 2.4      | C16 H30 O6        | 16.351               | 318.2043 | 317.1971           |
| Marchantin A                                | -     | -        | C28 H24 O5        | 16.426               | 440.1617 | 439.1548           |
| xi-Linalool 3-[rhamnosyl-(1->6)-glucoside]  | 1     | 1.8      | C22 H38 O10       | 16.776               | 462.2473 | 461.2395           |
| Neryl rhamnosyl-glucoside                   | 2     | 2.4      | C22 H38 O10       | 17.152               | 462.247  | 461.2393           |
| Methyl N-(a-methylbutyryl)glycine           | 1     | 1.4      | C9 H16 O4         | 17.228               | 188.1051 | 187.0979           |
| 2,3-dinor Thromboxane B1                    | 4     | -        | C18 H32 O6        | 17.453               | 344.2202 | 343.2129           |
| His Asn Val                                 | 29    | -        | C15 H24 N6 O5     | 18.155               | 368.1811 | 367.1738           |
| 2-Methylnaphthalene                         | 2     | 2.5      | C11 H10           | 18.179               | 142.0777 | 141.0709           |
| Lubiminol                                   | 32    | 32.2     | C15 H26 O3        | 18.192               | 254.1887 | 299.1869           |
| Sulfaphenazole                              | -     | -        | C15 H14 N4 O2 S   | 18.355               | 314.0829 | 313.0755           |
| 3-(1,1-Dimethylallyl)scopoletin 7-glucoside | 24    | 24.3     | C21 H26 O9        | 18.455               | 422.1578 | 421.1505           |
| Ismine                                      | -     | -        | C15 H15 N O3      | 18.58                | 257.1056 | 256.0983           |
| Citpressine I                               | 14    | 14.4     | C16 H15 N O5      | 18.581               | 301.0957 | 300.0885           |
| 2-glycerol-6-keto-PGF1 $\alpha$             | 1     | 1.5      | C23 H40 O8        | 18.906               | 444.2726 | 489.2709           |
| N-Feruloyltyramine                          | 12    | 12.2     | C18 H19 N O4      | 19.032               | 313.1315 | 312.1243           |
| Citpressine II                              | 14    | 14.4     | C17 H17 N O5      | 19.057               | 315.111  | 314.1038           |
| 9-hydroxy-hexadecan-1,16-dioic acid         | -     | -        | C16 H30 O5        | 19.332               | 302.2096 | 301.2024           |
| 2-Butanone, 4-(6-hydroxy-2-naphthalenyl)-   | -     | -        | C14 H14 O2        | 19.345               | 214.0994 | 213.0921           |
| Sebacic acid                                | 1     | 1.4      | C10 H18 O4        | 19.433               | 202.1205 | 201.1132           |
| Xylocarpus A                                | -     | -        | C31 H38 O11       | 19.696               | 586.2416 | 645.2556           |
| 2,3,4-Trihydroxy-4'-Ethoxybenzophenone      | -     | -        | C15 H14 O5        | 19.796               | 274.0847 | 273.0775           |
| Cinnzeylanol                                | 2     | 2.2      | C20 H32 O7        | 20.184               | 384.2159 | 443.229            |
| Hesperetin                                  | 17    | 17.4     | C16 H14 O6        | 20.359               | 302.0789 | 301.0716           |
| Baccatin III                                | 2     | 2.2      | C31 H38 O11       | 20.435               | 586.2415 | 645.2555           |
| 7-Methyl-2-benzofurancarboxaldehyde         | 19    | -        | C10 H8 O2         | 20.66                | 160.0524 | 159.0452           |
| Deacetoxy-7-Oxogedunin                      | -     | -        | C26 H30 O6        | 20.736               | 438.2042 | 437.1969           |
| beta-Lapachone                              | 19    | 19.45    | C15 H14 O3        | 20.936               | 242.0943 | 241.0871           |

| Compound                                                                      | Class | Subclass | Molecular Formula | Retention Time (min) | Mass     | Product Ions (m/z) |
|-------------------------------------------------------------------------------|-------|----------|-------------------|----------------------|----------|--------------------|
| 9,12,13-trihydroxy-10,15-octadecadienoic acid                                 | 1     | 1.2      | C18 H32 O5        | 21.136               | 328.2258 | 327.2185           |
| His Ile Gln                                                                   | 4     | -        | C17 H28 N6 O5     | 21.161               | 396.2127 | 395.2055           |
| Oleandolide                                                                   | -     | -        | C20 H34 O7        | 21.738               | 386.2308 | 445.2445           |
| 11,12,13-trihydroxy-9-octadecenoic acid                                       | 1     | 1.2      | C18 H34 O5        | 22.239               | 330.2412 | 329.234            |
| alpha-Ionol O-[arabinosyl-(1->6)-glucoside]                                   | 1     | 1.8      | C24 H40 O10       | 23.09                | 488.2617 | 487.2544           |
| 4'-Hydroxyfenoprofen                                                          | 20    | 20.4     | C15 H14 O4        | 23.216               | 258.0893 | 257.0821           |
| Ambrettolic acid                                                              | -     | -        | C16 H30 O3        | 24.493               | 270.2193 | 329.2332           |
| Isoliquiritigenin                                                             | 30    | 30.1     | C15 H12 O4        | 24.894               | 256.0734 | 255.0661           |
| Sarcosin                                                                      | 6     | 6.1      | C21 H34 O6        | 25.195               | 382.2353 | 427.2335           |
| 5-O-Methylembelin                                                             | 2     | 2.7      | C18 H28 O4        | 25.321               | 308.1988 | 307.1912           |
| Embelin                                                                       | 2     | 2.7      | C17 H26 O4        | 27.25                | 294.1832 | 293.176            |
| (±)9-HpODE                                                                    | 1     | 1.2      | C18 H32 O4        | 27.801               | 312.2301 | 311.2227           |
| 9-hydroperoxy-10E,12,15Z-octadecatrienoic acid                                | -     | -        | C18 H30 O4        | 28.102               | 310.2143 | 309.2071           |
| Gingerglycolipid A                                                            | 19    | 19.35    | C33 H56 O14       | 28.353               | 676.3672 | 721.3655           |
| Buthiobate                                                                    | 27    | 27.1     | C21 H28 N2 S2     | 28.803               | 372.1701 | 431.1837           |
| PE(18:3(9Z,12Z,15Z)/0:0)                                                      | 27    | 27.1     | C23 H42 N O7 P    | 29.004               | 475.2704 | 474.2633           |
| Tyr Cys Glu                                                                   | 4     | -        | C17 H23 N3 O7 S   | 31.309               | 413.1266 | 458.1246           |
| Lapachol                                                                      | 29    | 29.2     | C15 H14 O3        | 31.71                | 242.0947 | 241.0875           |
| Mupirocin                                                                     | 1     | 1.4      | C26 H44 O9        | 31.785               | 500.2989 | 559.3128           |
| LysoPE(0:0/16:0)                                                              | 27    | 27.1     | C21 H44 N O7 P    | 31.81                | 453.2857 | 452.2784           |
| 9(S)-HOTrE                                                                    | 1     | 1.2      | C18 H30 O3        | 32.011               | 294.2202 | 293.213            |
| PE(18:2(9Z,12Z)/0:0)                                                          | 27    | 27.1     | C23 H44 N O7 P    | 32.211               | 477.2857 | 476.2785           |
| Strophanthidin Semicarbazide                                                  | 3     | 3.3      | C24 H35 N3 O6     | 32.487               | 461.2519 | 520.2658           |
| alpha-licanic acid                                                            | -     | -        | C18 H28 O3        | 33.012               | 292.2042 | 291.1968           |
| Deoxygomisin A                                                                | -     | -        | C23 H28 O6        | 33.088               | 400.1886 | 399.1814           |
| alpha,alpha'-Trehalose 6-palmitate                                            | -     | -        | C28 H52 O12       | 33.389               | 580.3458 | 625.3441           |
| 9-OxoOTrE                                                                     | -     | -        | C18 H28 O3        | 33.639               | 292.204  | 291.1967           |
| 13(S)-HODE                                                                    | 1     | 1.2      | C18 H32 O3        | 34.216               | 296.2359 | 295.2287           |
| PA(18:3(9Z,12Z,15Z)/0:0)                                                      | 27    | 27.3     | C21 H37 O7 P      | 34.754               | 432.2278 | 431.2203           |
| 3,5-Dimethoxy-8,8-dimethyl-2-phenyl-4H,8H-benzo[1,2-b:3,4-b']dipyran-4-one    | -     | -        | C22 H20 O5        | 34.917               | 364.1316 | 363.1244           |
| Mangostinone                                                                  | 9     | 9.1      | C23 H24 O5        | 35.405               | 380.1633 | 379.1563           |
| Notoginsenoside T1                                                            | 2     | 2.6      | C36 H60 O10       | 35.543               | 652.419  | 651.4119           |
| (E)-4-(3,7-Dimethyl-2,6-octadienyl)-1,3,5-trihydroxyxanthone                  | 9     | 9.1      | C23 H24 O5        | 35.718               | 380.1632 | 379.1562           |
| 8-Desoxygartanin                                                              | 9     | 9.1      | C23 H24 O5        | 35.919               | 380.163  | 379.156            |
| Praecansan A                                                                  | -     | -        | C23 H24 O5        | 36.408               | 380.1636 | 379.1563           |
| 7-Methoxypraecansone B                                                        | -     | -        | C23 H24 O5        | 36.596               | 380.1632 | 379.1562           |
| 1,1-Diphenyl-2-(4-methoxyphenyl)propene                                       | -     | -        | C22 H20 O         | 37.422               | 300.1513 | 345.1496           |
| PE(18:0/0:0)                                                                  | -     | -        | C23 H48 N O7 P    | 37.448               | 481.3168 | 480.3097           |
| Desacetylvindoline                                                            | -     | -        | C23 H30 N2 O5     | 37.761               | 414.217  | 413.2098           |
| Tibolone                                                                      | 3     | 3.10     | C21 H28 O2        | 38.024               | 312.209  | 311.2017           |
| PG(16:0/0:0)                                                                  | -     | -        | C22 H45 O9 P      | 38.224               | 484.2802 | 483.273            |
| 1,3,8-Trihydroxy-4-methyl-2,7-diprenylxanthone                                | 9     | 9.1      | C24 H26 O5        | 38.324               | 394.1787 | 393.1717           |
| (25S)-5alpha-cholestan-3beta,4beta,6alpha,7beta,8beta,15alpha,16beta,26-octol | -     | -        | C27 H48 O8        | 38.625               | 500.3355 | 559.3495           |
| Kukoamine D                                                                   | 21    | 21.6     | C28 H42 N4 O6     | 39.803               | 530.3122 | 529.3052           |

| Compound                                                                                                                                                                                                                       | Class | Subclass | Molecular Formula | Retention Time (min) | Mass     | Product Ions (m/z) |
|--------------------------------------------------------------------------------------------------------------------------------------------------------------------------------------------------------------------------------|-------|----------|-------------------|----------------------|----------|--------------------|
| Kushenol A                                                                                                                                                                                                                     | -     | -        | C25 H28 O5        | 40.667               | 408.1938 | 407.1865           |
| PA(18:2(9Z,12Z)/0:0)                                                                                                                                                                                                           | 27    | 27.3     | C21 H39 O7 P      | 40.83                | 434.2435 | 433.2358           |
| 3-O-(2-O-(2E-decenoyl)-alpha-L-rhamnopyranosyl)-3-hydroxydecanoic acid                                                                                                                                                         | -     | -        | C36 H64 O10       | 41.03                | 656.4491 | 655.4418           |
| Pinolenic Acid                                                                                                                                                                                                                 | 1     | 1.2      | C18 H30 O2        | 41.206               | 278.2247 | 277.2174           |
| 2-Prenyl-6a-hydroxyphaseollidin                                                                                                                                                                                                | 28    | 28.1     | C25 H28 O5        | 41.331               | 408.1946 | 407.1871           |
| 16-hydroxy hexadecanoic acid                                                                                                                                                                                                   | 1     | 1.4      | C16 H32 O3        | 41.356               | 272.2353 | 271.2281           |
| 3R-hydroxy-eicosanoic acid                                                                                                                                                                                                     | 1     | 1.4      | C20 H40 O3        | 41.77                | 328.2979 | 327.2908           |
| 3'-Geranyl-3,4,2',4'-tetrahydrochalcone                                                                                                                                                                                        | 30    | 30.1     | C25 H28 O5        | 42.509               | 408.1944 | 407.1873           |
| Squamosinin A                                                                                                                                                                                                                  | 1     | 1.7      | C36 H62 O8        | 42.86                | 622.4438 | 621.4365           |
| Met Thr Arg                                                                                                                                                                                                                    | 4     | -        | C15 H30 N6 O5 S   | 43.01                | 406.199  | 405.1928           |
| Cedrediprenone                                                                                                                                                                                                                 | -     | -        | C25 H28 O5        | 43.323               | 408.1941 | 407.1871           |
| Docosanedioic acid                                                                                                                                                                                                             | 1     | 1.4      | C22 H42 O4        | 43.511               | 370.3088 | 369.3016           |
| Isohyodeoxycholic acid                                                                                                                                                                                                         | 3     | 3.1      | C24H40O4          | 43.536               | 392.2904 | 391.2832           |
| 1α-hydroxy-23-[3-(1-hydroxy-1-methylethyl)phenyl]-22,22,23,23-tetradecahydro-24,25,26,27-tetranorvitamin D3 / 1α-hydroxy-23-[3-(1-hydroxy-1-methylethyl)phenyl]-22,22,23,23-tetradecahydro-24,25,26,27-tetranorcholecalciferol | -     | -        | C32 H42 O3        | 44.513               | 474.3138 | 473.3067           |
| Ricinoleic acid methyl ester                                                                                                                                                                                                   | -     | -        | C19 H36 O3        | 44.576               | 312.2664 | 311.2591           |
| DL-2-hydroxy stearic acid                                                                                                                                                                                                      | 1     | 1.4      | C18 H36 O3        | 45.428               | 300.2666 | 299.2594           |
| 2-hydroxy behenic                                                                                                                                                                                                              | 1     | 1.4      | C22 H44 O3        | 45.641               | 356.3296 | 355.3224           |
| Lithocholic acid sulfate                                                                                                                                                                                                       | 3     | 3.1      | C24 H40 O6 S      | 45.678               | 456.2544 | 455.2473           |
| Tetracosanedioic acid                                                                                                                                                                                                          | 1     | 1.4      | C24 H46 O4        | 46.844               | 398.3396 | 397.3325           |
| 2-hydroxy-nonadecanoic acid                                                                                                                                                                                                    | -     | -        | C19 H38 O3        | 47.27                | 314.2817 | 313.2744           |
| 2-hydroxy-tricosanoic acid                                                                                                                                                                                                     | -     | -        | C23 H46 O3        | 47.445               | 370.3446 | 369.3373           |
| 15-methoxy-tricosanoic acid                                                                                                                                                                                                    | -     | -        | C24 H48 O3        | 49.55                | 384.3602 | 383.353            |

**Table S3.** Class and subclass of metabolites found in *R. nasutus* leaf and SCC extracts by UHPLC-QToF-MS analysis

| No | Class                                  | Subclass                                          |
|----|----------------------------------------|---------------------------------------------------|
| 1  | Class fatty acyls                      | 1.1 Subclass fatty amides                         |
|    |                                        | 1.2 Subclass lineolic acids and derivatives       |
|    |                                        | 1.3 Subclass fatty alcohol esters                 |
|    |                                        | 1.4 Subclass fatty acids and conjugates           |
|    |                                        | 1.5 Subclass eicosanoids                          |
|    |                                        | 1.6 Subclass fatty acyl thioesters                |
|    |                                        | 1.7 Subclass fatty alcohol                        |
|    |                                        | 1.8 Subclass fatty acyl glycosides                |
|    |                                        | 1.9 Subclass fatty acid esters                    |
| 2  | Class prenol lipids                    | 2.1 Subclass monoterpenoids                       |
|    |                                        | 2.2 Subclass diterpenoids                         |
|    |                                        | 2.3 Subclass terpene lactones                     |
|    |                                        | 2.4 Subclass terpene glycosides                   |
|    |                                        | 2.5 Subclass sesquiterpenoids                     |
|    |                                        | 2.6 Subclass triterpenoids                        |
|    |                                        | 2.7 Subclass quinone and hydroquinone lipids      |
|    |                                        | 2.8 Subclass sesterterpenoids                     |
|    |                                        | 2.9 Subclass polyprenols                          |
|    |                                        | 2.10 Subclass tetraterpenoids                     |
| 3  | Class steroids and steroid derivatives | 3.1 Subclass bile acids, alcohols and derivatives |
|    |                                        | 3.2 Subclass hydroxysteroids                      |
|    |                                        | 3.3 Subclass steroid lactones                     |
|    |                                        | 3.4 Subclass stigmastanes and derivatives         |



|    |                                        |                                                        |
|----|----------------------------------------|--------------------------------------------------------|
|    |                                        | 3.5 Subclass cholestane steroids                       |
|    |                                        | 3.6 Subclass vitamin D and derivatives                 |
|    |                                        | 3.7 Subclass androstane steroids                       |
|    |                                        | 3.8 Subclass sulfated steroids                         |
|    |                                        | 3.9 Subclass estrane steroid                           |
|    |                                        | 3.10 Subclass oxosteroids                              |
|    |                                        | 3.11 Subclass steroidal glycosides                     |
|    |                                        | 3.12 Subclass steroidal alkaloids                      |
| 4  | Class peptide                          | -                                                      |
| 5  | Class organonitrogen compounds         | 5.1 Subclass amines                                    |
|    |                                        | 5.2 Subclass quaternary ammonium salts                 |
| 6  | Class carboxylic acids and derivatives | 6.1 Subclass amino acids, peptides, and analogues      |
|    |                                        | 6.2 Subclass carboxylic acids                          |
|    |                                        | 6.3 Subclass dicarboxylic acids and derivatives        |
|    |                                        | 6.4 Subclass tricarboxylic acids and derivatives       |
|    |                                        | 6.5 Subclass carboxylic acid derivatives               |
|    |                                        | 6.6 Subclass gamma amino acids and derivatives         |
| 7  | Class stilbenes                        | 7.1 Subclass stilbene glycosides                       |
| 8  | Class organooxygen compounds           | 8.1 Subclass ethers                                    |
|    |                                        | 8.2 Subclass carbonyl compounds                        |
|    |                                        | 8.3 Subclass carbohydrates and carbohydrate conjugates |
| 9  | Class benzopyrans                      | 9.1 Subclass 1-benzopyrans                             |
|    |                                        | 9.2 Subclass 2-benzopyrans                             |
| 10 | Class tetrapyrroles and derivatives    | 10.1 Subclass porphyrins                               |

|    |                                      |                                                     |
|----|--------------------------------------|-----------------------------------------------------|
|    |                                      | 10.2 Subclass chlorins                              |
| 11 | Class phenol ethers                  | 11.1 Subclass anisoles                              |
| 12 | Class cinnamic acids and derivatives | 12.1 Subclass cinnamic acid esters                  |
|    |                                      | 12.2 Subclass hydroxycinnamic acids and derivatives |
|    |                                      | 12.3 Subclass cinnamic acids                        |
| 13 | Class tetracyclines                  | -                                                   |
| 14 | Class quinolines and derivatives     | 14.1 Subclass quinoline carboxylic acids            |
|    |                                      | 14.2 Subclass indoloquinolines                      |
|    |                                      | 14.3 Subclass hydroxyquinolines                     |
|    |                                      | 14.4 Subclass benzoquinolines                       |
|    |                                      | 14.5 Subclass quinolines and derivatives            |
|    |                                      | 14.6 Subclass quinolones and derivatives            |
| 15 | Class phenanthrenes and derivatives  | 15.1 Subclass hydrophenanthrenes                    |
| 16 | Class macrolides and analogues       | -                                                   |
| 17 | Class flavonoids                     | 17.1 Subclass flavans                               |
|    |                                      | 17.2 Subclass flavonoid glycosides                  |
|    |                                      | 17.3 Subclass pyranoflavonoid                       |
|    |                                      | 17.4 Subclass o-methylated flavonoids               |
|    |                                      | 17.5 Subclass flavones                              |
| 18 | Class diazanaphthalenes              | 18.1 Subclass benzodiazines                         |
| 19 | Others                               | 19.1 Subclass acetophenones                         |
|    |                                      | 19.2 Subclass indazoles                             |
|    |                                      | 19.3 Subclass linear diarylheptanoids               |
|    |                                      | 19.4 Subclass diphenylmethanes                      |
|    |                                      | 19.5 Subclass biphenols                             |

- 
- 19.6 Subclass pyranoisoflavonoids
  - 19.7 Subclass unsaturated aliphatic hydrocarbons
  - 19.8 Subclass phosphate esters
  - 19.9 Subclass glycerophosphates
  - 19.10 Subclass delta valerolactones
  - 19.11 Subclass lipids and lipid-like molecules
  - 19.12 Subclass diradylglycerols
  - 19.13 Subclass N-acylpyrrolidines
  - 19.14 Subclass pyridinecarboxylic acids and derivatives
  - 19.15 Subclass oxazoles
  - 19.16 Subclass chalcones and dihydrochalcones
  - 19.17 Subclass anthraquinones
  - 19.18 Subclass gamma-keto acids and derivatives
  - 19.19 Subclass phenols
  - 19.20 Subclass medium-chain hydroxy acids and derivatives
  - 19.21 Subclass naphthoquinones
  - 19.22 Subclass pyridinecarboxylic acids and derivatives
  - 19.23 Subclass medium-chain keto acids and derivatives
  - 19.24 Subclass non-metal nitrites
  - 19.25 Subclass pyridinecarboxylic acids and derivatives
  - 19.26 Subclass oxazolines
  - 19.27 Subclass thiophosphoric acid esters
  - 19.28 Subclass benzo-1,4-dioxanes
  - 19.29 Subclass isoindolines
-

|       |                                           |                                               |
|-------|-------------------------------------------|-----------------------------------------------|
| <hr/> |                                           | 19.30 Subclass phenylpyrrolidines             |
|       |                                           | 19.31 Subclass imidazolidines                 |
|       |                                           | 19.32 Subclass hybrid peptides                |
|       |                                           | 19.33 Subclass gamma butyrolactones           |
|       |                                           | 19.34 Subclass dibenzylbutanediol lignans     |
|       |                                           | 19.35 Subclass glycosylglycerols              |
|       |                                           | 19.36 Subclass alkanes                        |
|       |                                           | 19.37 Subclass dibenzylbutane lignans         |
|       |                                           | 19.38 Subclass tetrahydrofuran lignans        |
|       |                                           | 19.39 Subclass dialkyldisulfides              |
|       |                                           | 19.40 Subclass lysergic acids and derivatives |
|       |                                           | 19.41 Subclass diradylglycerol                |
|       |                                           | 19.42 Subclass carboximidic acids             |
|       |                                           | 19.43 Subclass triradylglycerols              |
|       |                                           | 19.44 Subclass organic nitrates               |
|       |                                           | 19.45 Subclass naphthopyranones               |
| <hr/> |                                           |                                               |
| 20    | Class benzene and substituted derivatives | 20.1 Subclass benzoic acids and derivatives   |
|       |                                           | 20.2 Subclass benzoyl derivatives             |
|       |                                           | 20.3 Subclass phenylpropanes                  |
|       |                                           | 20.4 Subclass diphenylethers                  |
|       |                                           | 20.5 Subclass benzenesulfonamides             |
|       |                                           | 20.6 Subclass acetophenones                   |
|       |                                           | 20.7 Subclass biphenols                       |
|       |                                           | 20.8 Subclass methoxybenzenes                 |
|       |                                           | 20.9 Subclass benzyloxycarbonyls              |
| <hr/> |                                           |                                               |

|    |                                   |                                                        |
|----|-----------------------------------|--------------------------------------------------------|
| 21 | Class phenols                     | 21.1 Subclass methoxyphenols                           |
|    |                                   | 21.2 Subclass nitrophenols                             |
|    |                                   | 21.3 Subclass benzenetriols and derivatives            |
|    |                                   | 21.4 Subclass 1-hydroxy-4-unsubstituted benzenoids     |
|    |                                   | 21.5 Subclass tyrosols and derivatives                 |
|    |                                   | 21.6 Subclass benzenediols                             |
| 22 | Class phenol ester                | -                                                      |
| 23 | Class indoles and derivatives     | 23.1 Subclass indole carboxylic acids and derivatives  |
|    |                                   | 23.2 Subclass indolyl carboxylic acids and derivatives |
|    |                                   | 23.3 Subclass hydroxyindoles                           |
|    |                                   | 23.4 Subclass pyridoindoles                            |
|    |                                   | 23.5 Subclass indoles                                  |
| 24 | Class coumarins and derivatives   | 24.1 Subclass hydroxycoumarins                         |
|    |                                   | 24.2 Subclass pyranocoumarins                          |
|    |                                   | 24.3 Subclass coumarin glycosides                      |
| 25 | Class pteridines and derivatives  | 25.1 Subclass pterins and derivatives                  |
| 26 | Class imidazopyrimidines          | 26.1 Subclass purines and purine derivatives           |
| 27 | Class glycerophospholipids        | 27.1 Subclass glycerophosphoethanolamines              |
|    |                                   | 27.2 Subclass glycerophosphocholines                   |
|    |                                   | 27.3 Subclass glycerophosphates                        |
| 28 | Class isoflavonoids               | 28.1 Subclass furanoisoflavonoids                      |
| 29 | Class naphthalenes                | 29.1 Subclass naphthols and derivatives                |
|    |                                   | 29.2 Subclass naphthoquinones                          |
| 30 | Class linear 1,3-diarylpropanoids | 30.1 Subclass chalcones and dihydrochalcones           |
| 31 | Class lactones                    | 31.1 Subclass gamma butyrolactones                     |

---

32 Class azoles

32.1 Subclass thiazoles

32.2 Subclass pyrazoles

32.3 Subclass imidazoles

---
